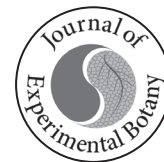

RESEARCH PAPER

# Root transcriptomic responses of grafted grapevines to heterogeneous nitrogen availability depend on rootstock genotype

Noé Cochetel<sup>1</sup>, Frédéric Escudé<sup>2</sup>, Sarah Jane Cookson<sup>1</sup>, Zhanwu Dai<sup>1</sup>, Philippe Vivin<sup>1</sup>, Pierre-François Bert<sup>1</sup>, Mindy Stephania Muñoz<sup>3</sup>, Serge Delrot<sup>1</sup>, Christophe Klopp<sup>2</sup>, Nathalie Ollat<sup>1</sup> and Virginie Lauvergeat<sup>1,\*</sup>

<sup>1</sup> EGFV, Bordeaux Sciences Agro, INRA, Université de Bordeaux, 33140 Villenave d'Ornon, France

<sup>2</sup> Genotoul Bioinformatics Platform, UR875 Mathematics and Applied Informatics of Toulouse, INRA, Castanet-Tolosan, France

<sup>3</sup> Departamento de Genética Molecular y Microbiología, Pontificia Universidad Católica de Chile, Alameda 340, PO Box 114-D, Santiago, Chile

\* Correspondence: [virginie.lauvergeat@inra.fr](mailto:virginie.lauvergeat@inra.fr)

Received 26 March 2017; Editorial decision 5 June 2017; Accepted 6 June 2017

Editor: Hideki Takahashi, Michigan State University

## Abstract

In many fruit species, including grapevine, grafting is used to improve scion productivity and quality and to adapt the plant to environmental conditions. However, the mechanisms underlying the rootstock control of scion development are still poorly understood. The ability of rootstocks to regulate nitrogen uptake and assimilation may contribute to this control. A split-root system was used to grow heterografted grapevines and to investigate the molecular responses to changes in nitrate availability of two rootstocks known to affect scion growth differently. Transcriptome profiling by RNA sequencing was performed on root samples collected 3 and 24 h after nitrogen supply. The results demonstrated a common response involving nitrogen-related genes, as well as a more pronounced transcriptomic reprogramming in the genotype conferring the lower scion growth. A weighted gene co-expression network analysis allowed the identification of co-regulated gene modules, suggesting a role for nitrate transporter 2 family genes and some transcription factors as main actors controlling this genotype-dependent response to heterogeneous nitrogen supply. The relationship between nitrate, ethylene, and strigolactone hormonal pathways was found to differ between the two genotypes. These findings indicated that the genotypes responded differently to heterogeneous nitrogen availability, and this may contribute to their contrasting effect on scion growth.

**Key words:** Grafted plants, grapevine, nitrate, RNA-seq, rootstocks, split-root system, transcriptome.

## Introduction

Grafting is increasingly used in fruit species and vegetable crops to improve crop yield and to reduce disease susceptibility (Goldschmidt, 2014; Warschefsky *et al.*, 2016). In viticulture, this practice is widely used in Europe, allowing grape growth (*Vitis vinifera* L.) in soils infected by phylloxera since the 19th century. In addition to their contribution to improving root

traits such as resistance to many soil-borne pests, rootstocks also affect scion growth, biomass allocation, and mineral nutrition, resulting in differences in yield and fruit quality (Csikasz-Krizsics and Diofasi, 2008; Dalbo *et al.*, 2011; Ollat *et al.*, 2016). The influence of rootstocks on the development and productivity of the scion is an important trait to consider

in the selection of rootstock genotypes in agriculture. Water and/or nutrient uptake and transport, hormonal regulation, and long-distance signalling have been investigated to explain the control of vegetative development of the scion by the rootstock in various species, including grapevine (Albacete *et al.*, 2015; Zhang *et al.*, 2016). In grapevine, among the different mechanisms involved, it has been shown that the heterografting process induces profound transcriptomic changes in the scion (Cookson and Ollat, 2013) and that the exchange of mRNA between the scion and rootstock could be influenced by the environment and the genotype (Yang *et al.*, 2015). The rootstock genotype affects the nitrogen (N) status of the grafted plant, and in some cases this effect was correlated with the ability of the rootstock to control scion vigour (Nikolaou *et al.*, 2000; Zerihun and Treeby, 2002). A recent study demonstrated that rootstock control of scion growth was dependent on N supply and correlated with distinct root and leaf ionome profiles (Lecourt *et al.*, 2015).

N nutrition is one of the major factors that influence plant growth. In aerobic soils, nitrate is the main source of N for most plants and represents an important regulator of biomass allocation, acting not only as a nutrient but also as a signal (Crawford and Glass, 1998). As the concentration of N in the soil is heterogeneous, plants have evolved adaptive mechanisms of N sensing and signalling, involving local and systemic signals, to utilize this resource efficiently (O'Brien *et al.*, 2016). In *Arabidopsis thaliana*, the primary nitrate response involves the transcriptional regulation of some genes, which occurs within minutes after a change in local nitrate supply (Medici and Krouk, 2014). As part of this response, the nitrate receptor NPF6.3 controls the transcriptional regulation of nitrate-responsive genes such as *NRT2.1* (Gojon *et al.*, 2011). This response is modulated by phosphorylation/dephosphorylation events involving the CBL-interacting protein kinases CIPK8 and CIPK23 (Bouguyon *et al.*, 2012) and protein phosphatase 2C family members, such as ABI2 (Léran *et al.*, 2015). Several nitrate-responsive gene regulators (LBD37/38/39, NLP7, SPL9 or NRG2) have also been identified (Vidal *et al.*, 2015; Xu *et al.*, 2016).

Nitrate uptake and assimilation are affected by not only local but also systemic signals coming from other parts of the plant, such as distant roots or shoots, to integrate the distribution of nitrate content in the soil with the nutritional and energy status of the plant (Nacry *et al.*, 2013; Krapp *et al.*, 2014; Krapp, 2015; O'Brien *et al.*, 2016). The plant's response to nitrate content heterogeneity includes morphological and physiological modifications that allow adaptive root foraging to ensure optimal N uptake. Several studies on the model plant *Arabidopsis* based on a split-root system have shown that the differential of root growth, that is, growth increase in N-rich zones and growth limitation in N-poor zones, is controlled by both local and systemic signals integrating systemic N demand and N supply signals (Ruffel *et al.*, 2011; Alvarez *et al.*, 2012; Bouguyon *et al.*, 2012). Some transcription factors involved in this regulation have been identified, such as ANR1, a MADS-box transcription factor (Gan *et al.*, 2012; Mounier *et al.*, 2014). NPF6.3, which acts upstream of ANR1, also plays an important role in the control of lateral

root growth through the regulation of auxin export from lateral root primordia (Gojon *et al.*, 2011). In addition to auxin, cytokinins, abscisic acid, and ethylene hormonal pathways, as well as peptide hormones such as C-TERMINALLY ENCODED PEPTIDE, are also controlled by nitrate concentration, and in turn regulate morphological and physiological responses to nitrate (Kiba *et al.*, 2011; Tabata *et al.*, 2014; Krouk, 2016; Ohkubo *et al.*, 2017).

Recently, the molecular networks that control N responses in relation to homogeneous or heterogeneous nitrate availability have been explored, mostly in herbaceous species (Vidal *et al.*, 2015; O'Brien *et al.*, 2016). Systems biology approaches performed in *Arabidopsis* have led to the identification of some master regulators that integrate systemic signals (Vidal *et al.*, 2013a, 2013b; Alvarez *et al.*, 2014; Canales *et al.*, 2014; Li *et al.*, 2014). In contrast, there is very little information available about the global transcriptomic changes induced by N supply in woody species, and even less in grafted perennial plants.

The aim of the present study was to determine whether two grapevine rootstocks [*Vitis riparia* cv. Riparia Gloire de Montpellier (RGM) and *Vitis berlandieri* × *Vitis rupestris* hybrid cv. 1103 Paulsen (1103P)], known to confer low and high scion vigour, respectively (Lecourt *et al.*, 2015; Zhang *et al.*, 2016), differ in their nitrate perception and signalling in response to a heterogeneous nitrate supply. These rootstocks were grafted with a scion of *Vitis vinifera* cv. Cabernet Sauvignon (CS). Grafted plants were grown in a split-root system under low N conditions in both root compartments and subjected to 24 h of a localized N supply (in one compartment). A global transcriptomic analysis by RNA sequencing (RNA-seq) was conducted on roots collected 3 and 24 h post-treatment (hpt). The results showed that for both rootstocks, the N-related gene expression pattern was extensively regulated in response to a local N supply. Interestingly, CS/RGM presented many more differentially expressed genes (DEGs) than CS/1103P according to the N treatment, and a weighted gene co-expression network analysis (WGCNA) approach allowed the identification of N-related modules specific to the CS/RGM combination.

## Materials and methods

### Plant materials and split-root experiment

The two rootstock genotypes, RGM and 1103P, were both grafted with the scion genotype CS. A double-grafting system (Tandonnet *et al.*, 2010) was used to obtain two-roots-one-shoot plants. Grafted plants resembled an inverted 'Y' (Fig. 1A). The combinations CS/RGM and CS/1103P were analysed. After callusing and rooting, grafted plants were cultivated in two sand-filled pots of 3 l capacity (one per root system) in a greenhouse and irrigated with a full nutrient solution (Cookson *et al.*, 2012) for 24 d of acclimation (Fig. 1A). A low-nitrate-content nutrient solution [LN: 0.8 mM KNO<sub>3</sub>, 0.57 mM K<sub>2</sub>HPO<sub>4</sub>, 0.69 mM MgSO<sub>4</sub>, 1.39 mM CaCl<sub>2</sub>, 0.8 mM K<sub>2</sub>SO<sub>4</sub>, 0.3 mM CaSO<sub>4</sub>, and micronutrients as described by Lecourt *et al.* (2015)] was then applied for 2 weeks. At 0 hpt, one side of the root system was irrigated with 1 l of 5 mM high-nitrate (HN) solution ('HN roots') and the other side was irrigated with LN solution ('LN roots'). The HN solution was produced from LN

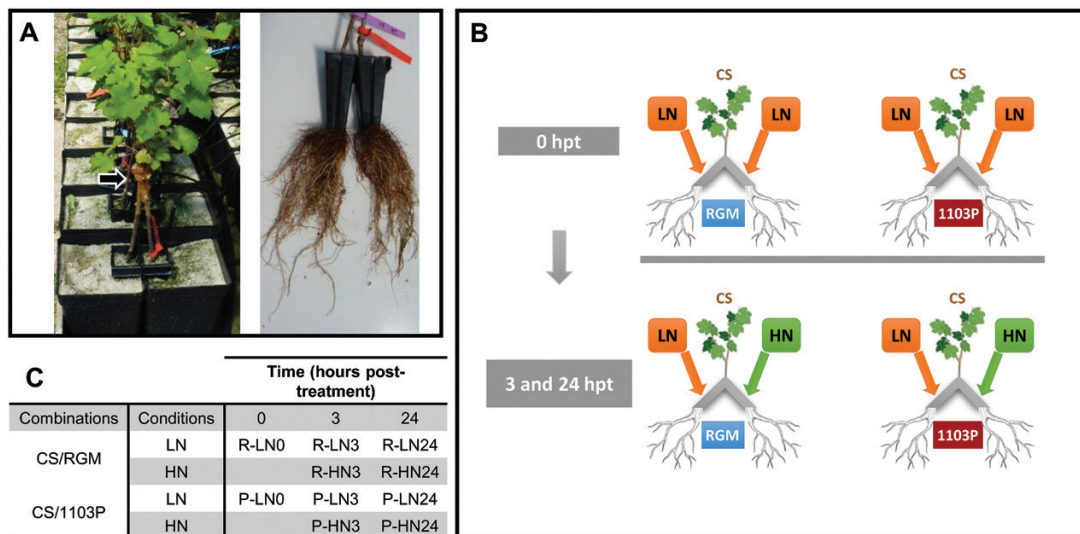

**Fig. 1.** Split-root experiment in the greenhouse. (A) A scion was grafted on to two rootstock cuttings of the same genotype. Both sides of the root system were grown in two separated pots (left). The arrow indicates the grafting point. Right panel, photograph of a root system harvested during the experiment. (B) Diagram outlining the experimental protocol. The whole root system was supplied with LN solution (0.8 mM nitrate) for 2 weeks. Root samples from three plants per combination were then harvested (0 hpt samples). At the same time, one side of the root system of 6 other plants was supplied with 1 l of HN solution (5 mM nitrate). Root tip samples from each part of the root system (two root samples per plant: HN roots and LN roots) were harvested 3 or 24 h after HN supply (3 and 24 hpt samples). (C) Nomenclature of harvested samples. Three individual plants (biological replicates) were harvested per condition. CS, Cabernet Sauvignon; RGM, Riparia Gloire de Montpellier; 1103P, 1103 Paulsen. (This figure is available in colour at JXB online.)

solution by adding  $\text{KNO}_3$  up to 5 mM, and adjusting the  $\text{K}_2\text{SO}_4$  and  $\text{CaSO}_4$  concentrations to equilibrate the  $\text{K}^+$  between LN and HN solutions. Root tips (the first 2 cm from the root cap) were harvested at 0, 3, and 24 h after application of the HN solution, immediately frozen in liquid nitrogen, and stored at  $-80^\circ\text{C}$ . Three plants (biological replicates) of each combination were sampled at each time point, with two root samples per plant (LN and HN roots) for 3 and 24 hpt (Fig. 1B, C).

#### RNA extraction, library preparation, and sequencing

Total RNAs were isolated from 30 samples (three biological replicates per condition; the conditions are illustrated in Fig. 1C), as described by Cookson *et al.* (2013). Total RNAs were sent to IGBMC Microarray and Sequencing Platform (Strasbourg, France) and their quality was further determined using an Agilent 2100 Bioanalyzer (Agilent Technologies). The preparation of the libraries was performed by the IGBMC Microarray and Sequencing Platform using the TruSeq RNA Sample Prep Kit (Illumina Inc.). Libraries were sequenced with an Illumina HiSeq 2000 sequencer (Illumina Inc.) and 50 bp single reads were generated. The data have been deposited in the National Center for Biotechnology Information (NCBI) Sequence Read Archive (<http://www.ncbi.nlm.nih.gov/sra>, last accessed 19 June 2017) under accession number PRJNA342391.

#### Pre-processing of RNA-seq data

Quality checks were done with fastQC on the Galaxy website hosted on the Abims Bioinformatics Platform (Roscoff, France) (<http://abims.sb-roscoff.fr/resources/galaxy>, last accessed 19 June 2017). The raw reads were then filtered by the Genotoul Bioinformatics Platform (Toulouse, France) with trimming of the low-quality reads with an average Phred score  $<28$  (see Supplementary Table S1 at JXB online).

#### De novo assembly

*De novo* assembly was performed by the Genotoul Bioinformatics Platform using DRAP v1.3 (Cabau *et al.*, 2017).

This meta-assembler first performed an assembly with Trinity (Grabherr *et al.*, 2011) or Oases (Schulz *et al.*, 2012) using the multi-kmers approach. After assembly compaction, poorly supported and misassembled transcripts were filtered out using a reads per kilobase per million mapped reads (RPKM) threshold of 1, 3, or 10 (Supplementary Table S2). Considering the results of the different assemblies (Supplementary Table S2), the assembly with Oases multi-kmers and an RPKM threshold of 1 was selected.

#### Functional annotation of de novo assembled transcriptome

Functional annotation was performed by the Genotoul Bioinformatics Platform with series of BLASTX against different protein databases from Ensembl hosted on the Genotoul server. Contigs were post-filtered on read alignment and the best-hit annotation was selected for each of them. Gene Ontology (GO) terms were predicted using Interproscan 5. All the data were available on a web interface RNAbrowse (<http://ngspipelines2.toulouse.inra.fr:9005/ngspipelines/#!/NGSpipelines/Vitis%20rupestris%20-%20RGMand1103P>, last accessed 19 June 2017), which is described as an RNA-seq *de novo* assembly results browser (Mariette *et al.*, 2014). The best annotation file was downloaded and a BIN code assignment was performed using Mercator (Lohse *et al.*, 2014). Enrichments of functional categories of the Mercator annotation in the significantly differentially expressed gene sets were tested for significance by Fisher's exact tests with a Bonferroni correction for multiple tests, using Mefisto version 0.23beta (<http://www.usadellab.org>, last accessed 19 June 2017).

#### Quality evaluation

To assess the reliability of the *de novo* assembled transcriptome, raw reads were aligned against it using the aligner BWA MEM (Li and Durbin, 2009). The completeness of the assembly was determined through the use of the Core Eukaryotic Genes Mapping Approach (CEGMA) (<http://korflab.ucdavis.edu/Datasets/cegma/>, last accessed 20 July 2016) (Parra *et al.*, 2009), which allows comparison

between the transcriptome and a dataset containing highly conserved annotated core proteins.

#### Analysis of differential expression

Raw counts were determined using BWA MEM and SAMTools (Li *et al.*, 2009), generating an overall counts matrix. Then, the R package edgeR (Robinson *et al.*, 2010) was used to identify differentially expressed genes using a stringent threshold: absolute value of Log Fold Change (LFC) >1 and False Discovery Rate (FDR) <0.01.

#### Network analysis

A co-expression gene network was constructed using the WGCNA software package (v1.51) in R (Langfelder and Horvath, 2008) using all the libraries except those corresponding to time 0 hpt (24 libraries). In order to remove low-expressed contigs (reflecting noise), a filter was applied to keep only contigs that had at least 20 counts in 70% of the libraries. A total of 45 358 contigs satisfying the above threshold were obtained, and their counts data were transformed using the function varianceStabilizingTransformation of the package DESeq2 (Love *et al.*, 2014). The resulting set of counts was used for network construction and module detection using the function blockwiseModules. Briefly, an adjacency matrix was created by calculating the biweight mid-correlation raised to a power  $\beta$  of 8 (soft-threshold estimated with the pickSoftThreshold function) and the maxPoutliers parameter set to 0.05. The subsequent Topological Overlap Matrix (TOM) was used for module detection using the DynamicTreecut algorithm with a minimal module size of 30 and a branch merge cut height of 0.25. The module eigengenes were used to evaluate the association between the 26 resulting modules and traits (genotype, treatment, and time).

#### Validation of RNA-seq analysis by quantitative real-time PCR

Total RNAs were reverse transcribed into cDNA using the SuperScript III First-Strand Synthesis System for RT-PCR (Invitrogen). Quantitative real-time PCR (qPCR) reactions were performed using SYBR Green on an iCycler iQH (Bio-Rad), according to the procedure described by the supplier. The relative expression of the genes was calculated using the  $2^{-\Delta\Delta Ct}$  method (Livak and Schmittgen, 2001), and using the reference genes *EF1 $\gamma$*  and *GAPDH* for normalization. Primer sequences are listed in Supplementary Table S3.

#### Nitrate measurements

Total nitrate concentration was measured according to the modified method of Cataldo *et al.* (1975). Samples (150 mg) of whole root were ground and mixed in 400  $\mu$ l 7.5% trichloroacetic acid, and centrifuged at 16 000 *g* for 5 min. Then, 200  $\mu$ l 5% salicylic acid in concentrated H<sub>2</sub>SO<sub>4</sub> was added to 62.5  $\mu$ l of the supernatant, and after 20 min at room temperature, 4.75 ml 2M NaOH was added. The absorbance at 410 nm of each sample was measured using an Epoch 2 microplate spectrophotometer (Bio Tek Instruments). A standard curve was constructed using a 0.25 g l<sup>-1</sup> NO<sub>3</sub><sup>-</sup> N solution. For each sample, a negative control was done where the salicylic acid solution was replaced with 0.2 ml concentrated H<sub>2</sub>SO<sub>4</sub>.

## Results

### De novo assembly and annotation of a root transcriptome from grafted Vitis plants

To obtain a comprehensive overview of the transcriptome changes in response to rootstock genotype and/or N supply,

30 cDNA libraries were constructed from root tips of two scion/rootstock combinations, CS/1103P and CS/RGM, grown in a split-root system (Fig. 1). The sequencing was performed using an Illumina Hiseq 2000 sequencer and approximately 40 million 50 bp single reads were obtained for each sample (Supplementary Table S1). More than 97% of the raw reads passed the quality evaluation based on a Phred score threshold.

In grapevine, the reference genome is that of PN40024, a *V. vinifera* accession (Jaillon *et al.*, 2007). Since the two rootstocks used in this study belong to different species of the genus *Vitis*, relying on the reference genome may underestimate the variability among the genotypes and may not allow the identification of specific genes or isoforms. Therefore, a *de novo* assembly strategy was chosen in order to build the most comprehensive transcriptome allowing differential expression analysis between the two studied genotypes. Briefly, a total of 1.19 billion cleaned reads from the 30 cDNA libraries were assembled into contigs using the Oases assembler, with an RPKM threshold of 1, which allowed a higher percentage of contigs showing protein assignments (Supplementary Table S2). A total of 51 250 contigs (47 519 774 bp) were generated, with an N50 at 1481 (Supplementary Table S2). The assembly generated a high number of transcripts enriched for smaller-sized contigs (51.56% of contigs were in the size range 201–599 bp; Supplementary Fig. S1).

To assign putative gene functions and annotations to all the assembled contigs, BLASTX alignment was performed against protein databases such as Swissprot, Refseq, and several Genotoul bioinformatics platform internal databases of different species, including *Medicago truncatula*, *Theobroma cacao*, *Populus trichocarpa*, *A. thaliana*, *Prunus persica*, and *V. vinifera*, using a cut-off E-value of 1e-5. The best hit for each contig was selected and they were further categorized by GO functional annotation (Fig. 2). Among the 51 250 contigs, 17 683 were associated to at least one GO category, generating 48 257 GO annotations. Furthermore, the BLASTX series provided insights into the taxonomic distribution of the transcripts, with, as expected, more than 75% of contigs having top hits to sequences from *V. vinifera* (Supplementary Fig. S2). This species distribution suggested that the assembly and annotation of this *Vitis* root transcriptome were correct and reliable. To complete the annotation process, Mercator, another classification tool for next-generation sequencing data (Lohse *et al.*, 2014), was used to assign BIN codes. In total, 56 268 annotations were generated, corresponding to 51 012 contigs covering almost all the transcriptome (Fig. 3).

In order to examine the representation of the transcriptome of the RNA-seq reads, reads were mapped back to the *de novo* assembly, and showed more than 90% of mapping for all the samples (data not shown). Finally, the completeness of the *de novo* assembled transcriptome was evaluated by comparison of its 51 250 contigs with a set of highly conserved core proteins using the CEGMA pipeline (Parra *et al.*, 2009),

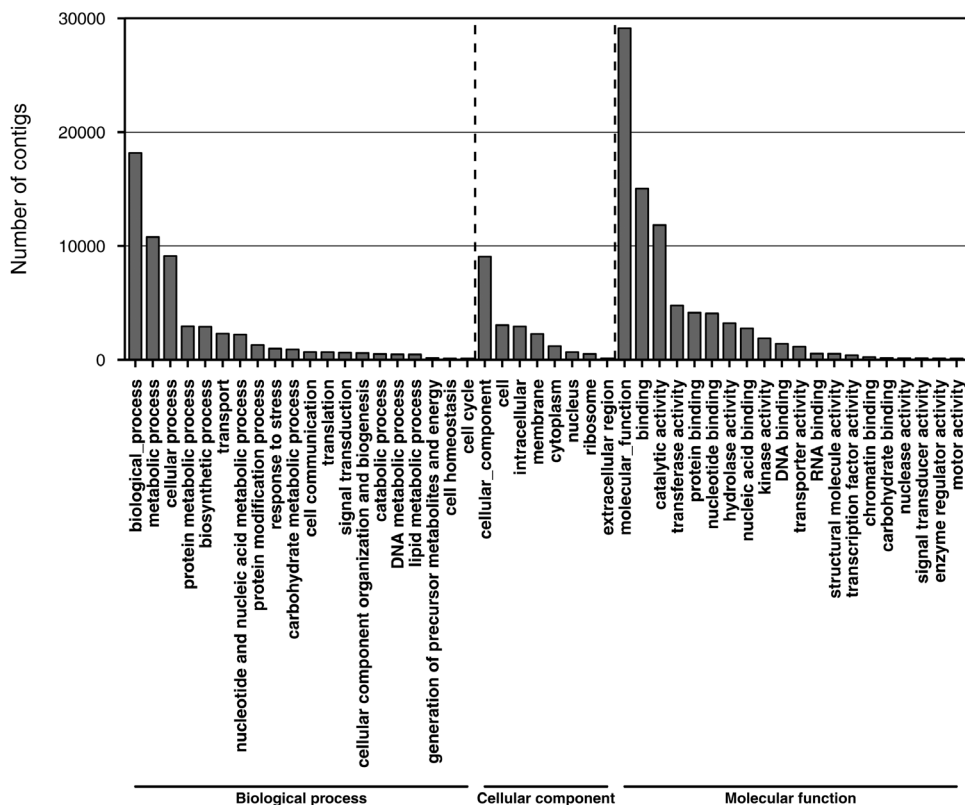

**Fig. 2.** Gene ontology (GO) distribution of the *de novo* merged transcriptome. The distribution of the contigs among level 1 GO categories of biological process, cellular component, and molecular function is shown. Molecular function was the category that contained the highest number of contigs of the assembled transcriptome.

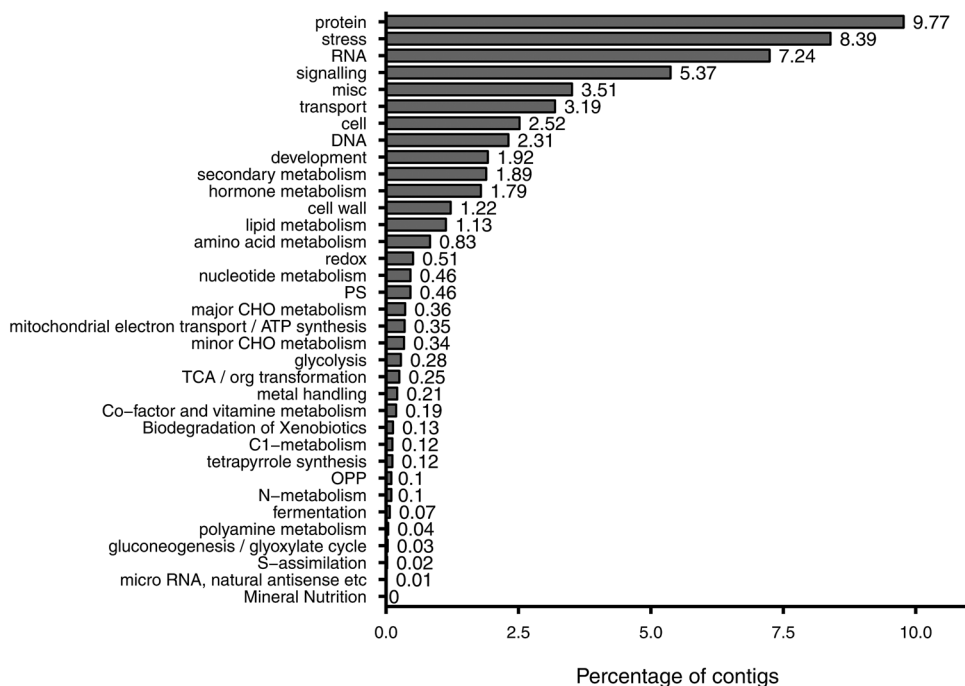

**Fig. 3.** Classification of the *de novo* merged transcriptome into BIN code classes. The percentage of contigs annotated in each BIN code compared with the total number of annotations generated by Mercator is presented. Category number 35, 'not assigned', is not shown, and contained 44.7% of the assignments.

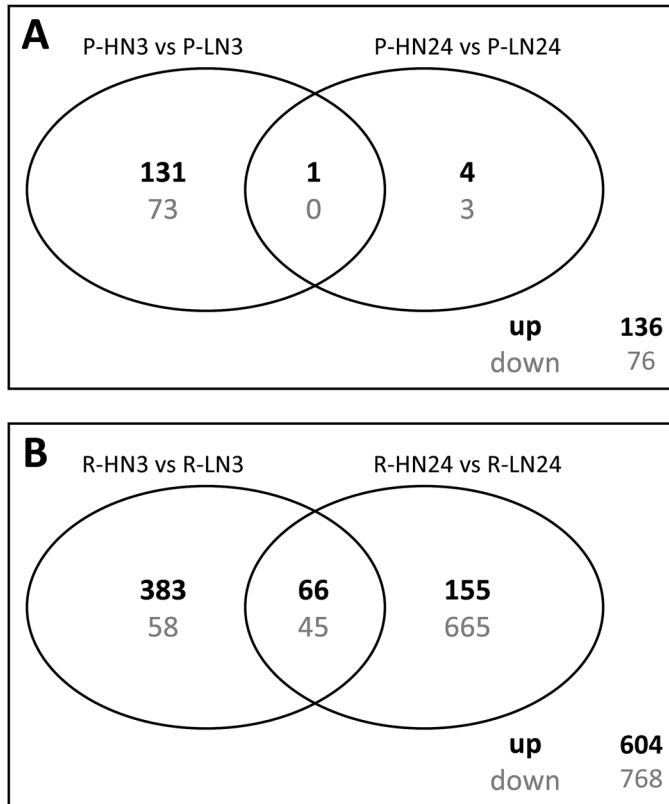

**Fig. 4.** Analysis of the differentially expressed genes (DEGs) in roots in response to heterogeneous N availability in the two scion/rootstock combinations. Venn diagrams show the number of transcripts that were up-regulated (bold) and down-regulated (grey) in HN roots compared with LN roots at 3 and 24 hpt in (A) CS/1103P plants and (B) CS/RGM plants. In (B), in addition to the 1369 contigs that were differentially expressed, three contigs were duplicated since they followed a different regulation pattern (i.e. up- or down-regulated) between 3 and 24 hpt.

allowing the identification of 98.39% of the 248 core eukaryotic genes contained in this core dataset.

#### *Heterogeneous nitrate supply induces a larger modification in the root transcriptome of CS/RGM compared with CS/1103P*

Representation of each sample in a multidimensional scaling plot view (Supplementary Fig. S3) showed a clear clustering of the samples depending on the rootstock genotype and the N treatment. Moreover, the separation between LN and HN root transcriptomes was more pronounced for the combination CS/RGM than for CS/1103P. DEGs were then identified by comparing LN and HN roots at 3 or 24 hpt for the two combinations, with the threshold of  $|LFC| > 1$  and  $FDR < 0.01$  (Supplementary Table S4). As shown in Fig. 4, the number of DEGs in response to high local N treatment was very different in the two combinations. CS/RGM exhibited a much higher number of DEGs (1369 DEGs in total; Fig. 4B) than CS/1103P (212 DEGs) (Fig. 4A). In CS/1103P, the majority of DEGs (205) was found at 3 hpt, and 132 of them were up-regulated in HN roots compared with LN roots. In the combination CS/RGM, most of the DEGs at 3 hpt (81%) were

up-regulated in HN roots, while the majority of the DEGs found at 24 hpt (76%) were down-regulated.

Comparing the lists of the DEGs allowed the identification of 172 common DEGs between CS/1103P and CS/RGM (Supplementary Table S4), among which 115 transcripts exhibited the same response to N treatment in both combinations (Fig. 5A). At 24 hpt, only four transcripts shared a common pattern, one being up-regulated and three down-regulated. The majority of the DEGs (54%) found in CS/1103P were common to those in CS/RGM. However, CS/RGM possessed a higher number of genotype-specific DEGs (Fig. 4), and only 8% of the total number of DEGs found in CS/RGM was shared with CS/1103P.

#### *Both CS/RGM and CS/1103P share a core set of genes differentially regulated in response to N variation*

The 172 common DEGs shared between both rootstock genotypes were mainly associated with hormone metabolism and N-related functional categories (Fig. 5B). In both combinations, the HN treatment altered the expression of genes linked to N metabolism and transport, oxidative pentose phosphate (OPP), tetrapyrrole synthesis, and RNA regulation, as shown by the enrichment analysis (Fig. 5B). A double hierarchical clustering performed on these common DEGs highlighted two major clusters for samples and three major clusters for gene expression profiles. The two clusters for samples were mainly separated by the N conditions for both genotypes (Fig. 5C). With regard to the transcript expression profiles, most of the genes associated with N metabolism functional categories were present in cluster 1 (Fig. 5C), showing an up-regulation in HN roots compared with LN roots at 3 hpt. The 15 transcripts of cluster 2 were also induced in HN roots only at 3 hpt in both genotypes. However, these transcripts were more highly expressed in CS/1103P compared with CS/RGM. Lastly, cluster 3 contained 63 transcripts, most of which encoded putative proteins associated with ethylene hormone metabolism, a functional category that showed significant enrichment (Fig. 5B). Interestingly, this cluster contained 57 transcripts that showed a different regulation pattern in response to N treatment between the two combinations (i.e. they are not presented in the Venn diagram in Fig. 5A). In CS/1103P, these transcripts were down-regulated only at 3 hpt after the HN treatment, while they were differentially regulated specifically at 24 hpt in CS/RGM between LN and HN roots.

#### *N treatment regulates gene expression in a rootstock-dependent manner*

In addition to the 172 common DEGs, each scion/rootstock combination possessed a specific set of DEGs, since 212 and 1369 transcripts were found to be differentially expressed in CS/1103P and CS/RGM, respectively (Fig. 4A, B). The enriched functional categories present in the total list of DEGs in response to the N treatment at 3 and 24 hpt in CS/1103P (Supplementary Fig. S4A) were almost the same as those found for the common DEGs (Fig. 5B). Among the 40 DEGs specific to CS/1103P, 25 were annotated as 'not

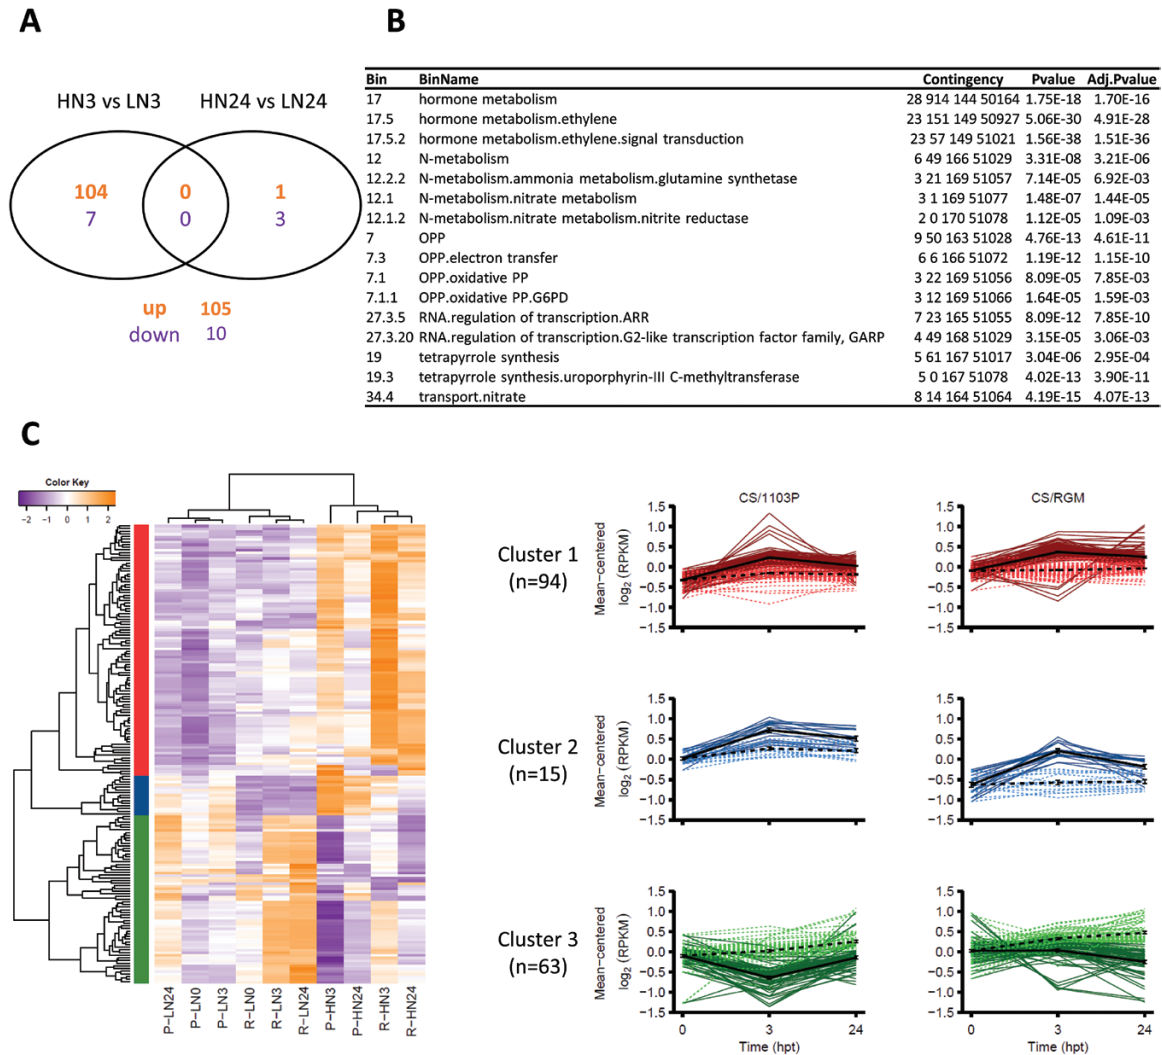

**Fig. 5.** A core set of N-related genes was shared between CS/1103P and CS/RGM in response to heterogeneous N availability. (A) Venn diagram of the common DEGs following the same expression pattern at 3 and 24 hpt in both rootstock genotypes (up-regulation is represented in orange text and down-regulation in purple). (B) BINs enriched in the list of common DEGs ( $n=172$ ). The Contingency column shows the number of genes (i) in the BIN in the input list, (ii) in the background, (iii) not in the BIN in the input list, and (iv) not in the background.  $P$ -values were adjusted with a Bonferroni correction. Values were filtered with an adjusted  $P$ -value threshold  $<0.01$  and an enrichment  $>1$ . (C) Hierarchical clustering of the transcripts and the different conditions (i.e. genotype  $\times$  treatment  $\times$  harvesting time) in a heatmap presenting the expression pattern of each DEG (rows) within the different conditions (columns). The harvesting time 0 hpt was excluded during the hierarchical clustering process. Expression values are RPKM  $\log_2$ -transformed with up-regulation to down-regulation varying from orange to purple. Right panel, transcript clusters were extracted using the gene hierarchical clustering tree. The x-axis of each plot represents the harvesting time (in hpt); the y-axis represents the mean-centred RPKM  $\log_2$ -transformed values. The HN condition is indicated by dark-coloured solid lines and the LN condition by light-coloured dashed lines. For each cluster by genotype, mean $\pm$ SE values are represented in black.

assigned', and the others were present in clusters 1 and 2 (8 and 7 DEGs, respectively). They were associated to different functional categories, such as cell wall, miscellaneous, and development. Two ERF/AP2 transcription factors were identified and these belonged to cluster 1 (Supplementary Table S4; Supplementary Fig. S4B).

In CS/RGM, the enrichment analysis performed with all the DEGs showed functional categories that were not significantly enriched either in the common list of DEGs or in the CS/1103P-specific DEGs (Fig. 6A). Categories related to abiotic stress, fermentation, secondary metabolism (flavonoids), and gibberellin metabolism were among them (Fig. 6A; Supplementary Fig. S5A, B). The hierarchical clustering of the 1369 DEGs allowed the identification of nine clusters

(Fig. 6B). Genes related to fermentation and secondary metabolism were present in cluster 4, and followed the same pattern as N-related genes that were up-regulated at 3 hpt in HN roots. Cluster 1 transcripts showed decreased expression at 3 hpt in the LN roots and were mainly linked to regulation of transcription. Cluster 6, which contained 40% of the DEGs, was related to hormone metabolism (mainly ethylene and gibberellin), RNA regulation of transcription, and signalling. Several gibberellin-metabolism-associated genes were also included in cluster 8. The remaining 14% of the CS/RGM DEGs were separated into five clusters, and most of them were not assigned.

Both rootstock genotypes showed regulation of hormone metabolism genes in response to N treatment, but with some

**A**

| Bin           | BinName                                                                                                | Contingency        | Pvalue   | Adj.Pvalue (Bonf.) |
|---------------|--------------------------------------------------------------------------------------------------------|--------------------|----------|--------------------|
| 5             | fermentation                                                                                           | 18 22 1351 49859   | 2.79E-18 | 1.10E-15           |
| 5.3           | fermentation.ADH                                                                                       | 13 4 1356 49877    | 7.19E-18 | 2.82E-15           |
| 5.2           | fermentation.PDC                                                                                       | 5 3 1364 49878     | 7.07E-07 | 2.77E-04           |
| 17            | hormone metabolism                                                                                     | 83 859 1286 49022  | 3.42E-21 | 1.34E-18           |
| 17.5          | hormone metabolism.ethylene                                                                            | 45 129 1324 49752  | 3.09E-31 | 1.21E-28           |
| 17.5.3        | hormone metabolism.ethylene.induced-regulated-responsive-activated                                     | 8 30 1361 49851    | 6.09E-06 | 2.39E-03           |
| 17.5.2        | hormone metabolism.ethylene.signal transduction                                                        | 37 43 1332 49838   | 1.09E-36 | 4.26E-34           |
| 17.6          | hormone metabolism.gibberelin                                                                          | 12 69 1357 49812   | 1.63E-06 | 6.38E-04           |
| 17.6.1.11     | hormone metabolism.gibberelin.synthesis-degradation.GA20 oxidase                                       | 4 1 1365 49880     | 2.48E-06 | 9.72E-04           |
| 26            | misc                                                                                                   | 92 1858 1277 48023 | 1.92E-07 | 7.53E-05           |
| 12            | N-metabolism                                                                                           | 20 35 1349 49846   | 6.21E-18 | 2.43E-15           |
| 12.2          | N-metabolism.ammonia metabolism                                                                        | 16 19 1353 49862   | 1.55E-16 | 6.09E-14           |
| 12.2.2        | N-metabolism.ammonia metabolism.glutamine synthetase                                                   | 14 10 1355 49871   | 1.35E-16 | 5.29E-14           |
| 12.1          | N-metabolism.nitrate metabolism                                                                        | 4 0 1365 49881     | 5.07E-07 | 1.99E-04           |
| 7             | OPP                                                                                                    | 13 46 1356 49835   | 4.31E-09 | 1.69E-06           |
| 7.3           | OPP.electron transfer                                                                                  | 8 4 1361 49877     | 1.14E-10 | 4.48E-08           |
| 29.5.11.4.3.1 | protein.degradation.ubiquitin.E3.SCF.SKP                                                               | 10 43 1359 49838   | 1.23E-06 | 4.82E-04           |
| 27.3.3        | RNA.regulation of transcription.AP2/EREBP. APETALA2/Ethylene-responsive element binding protein family | 12 65 1357 49816   | 9.33E-07 | 3.66E-04           |
| 27.3.5        | RNA.regulation of transcription.ARR                                                                    | 12 18 1357 49863   | 6.98E-12 | 2.74E-09           |
| 27.3.20       | RNA.regulation of transcription.G2-like transcription factor family. GARP                              | 9 44 1360 49837    | 1.04E-05 | 4.07E-03           |
| 16.8.5        | secondary metabolism.flavonoids.isoflavones                                                            | 7 17 1362 49864    | 2.22E-06 | 8.70E-04           |
| 16.8.5.1      | secondary metabolism.flavonoids.isoflavones.isoflavone reductase                                       | 7 17 1362 49864    | 2.22E-06 | 8.70E-04           |
| 30.2.22       | signalling.receptor kinases.proline extensin like                                                      | 6 17 1363 49864    | 2.46E-05 | 9.62E-03           |
| 20.2          | stress.abiotic                                                                                         | 44 618 1325 49263  | 5.98E-08 | 2.35E-05           |
| 20.2.4        | stress.abiotic.touch/wounding                                                                          | 17 22 1352 49859   | 4.77E-17 | 1.87E-14           |
| 8.3           | TCA / org transformation.carbonic anhydrases                                                           | 7 11 1362 49870    | 2.35E-07 | 9.21E-05           |
| 19.3          | tetrapyrrole synthesis.uroporphyrin-III C-methyltransferase                                            | 5 0 1364 49881     | 1.35E-08 | 5.29E-06           |
| 34            | transport                                                                                              | 77 1604 1292 48277 | 6.75E-06 | 2.64E-03           |
| 34.4          | transport.nitrate                                                                                      | 14 8 1355 49873    | 2.31E-17 | 9.06E-15           |

**B**

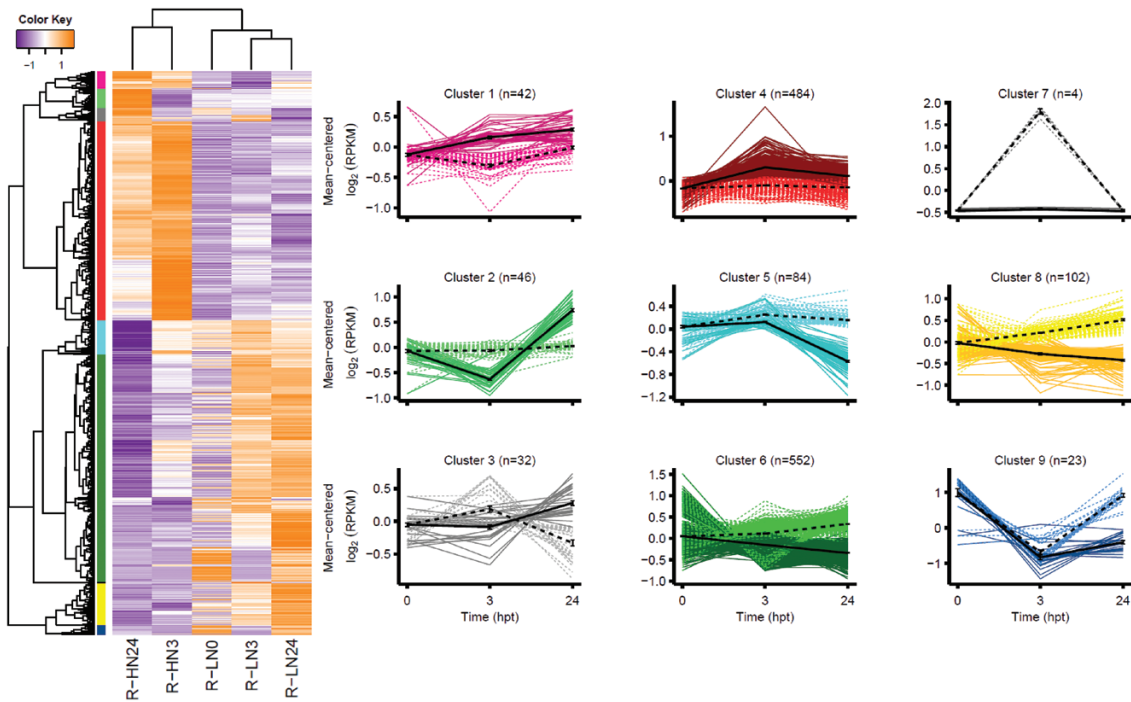

**Fig. 6.** In response to higher N availability, six-fold more genes were differentially expressed in CS/RGM compared with CS/1103P. (A) Enrichment analysis of the DEGs from CS/RGM ( $n=1369$ ). The Contingency column shows the number of genes (i) in the BIN in the input list, (ii) in the background, (iii) not in the BIN in the input list, and (iv) not in the background.  $P$ -values were adjusted with a Bonferroni correction. Values were filtered with an adjusted  $P$ -value threshold  $<0.01$  and an enrichment  $>1$ . (B) Hierarchical clustering of the transcripts and the different conditions (i.e. treatment  $\times$  harvesting time) in a heatmap presenting the expression pattern of each DEG (rows) within the different samples (columns). The harvesting time 0 hpt was excluded during the hierarchical clustering process. Expression values are RPKM  $\log_2$ -transformed with up-regulation to down-regulation varying from orange to purple. Right panel, transcript clusters were extracted using the gene hierarchical clustering tree. The x-axis of each plot represents the harvesting time (in hpt); the y-axis represents the mean-centred RPKM  $\log_2$ -transformed values. The HN condition is indicated by dark-coloured solid lines and the LN condition by light-coloured dashed lines. Mean $\pm$ SE values are represented in black.



**Table 1.** List of genes associated with N metabolism and transport that were differentially expressed between the LN and HN conditions in CS/1103P and/or CS/RGM at 3 and 24 h post-treatment (hpt)

| Name    | Function                         | Contig name           | CRIBI accession v1 | CS/1103P    |        | CS/RGM      |             |
|---------|----------------------------------|-----------------------|--------------------|-------------|--------|-------------|-------------|
|         |                                  |                       |                    | HN vs. LN   |        | HN vs. LN   |             |
|         |                                  |                       |                    | 3 hpt       | 24 hpt | 3 hpt       | 24 hpt      |
| 6PGDH   | 6-phosphogluconate dehydrogenase | mix_LOC100241717      | VIT_02s0025g00900  | 0.91        | 0.5    | <b>1.85</b> | <b>1.04</b> |
| AMT3.1  | Ammonium transporter 3.1         | mix_LOC100252515      | VIT_07s0031g02950  | -0.97       | 0      | -1.3        | -2.31       |
| AMT3.3  | Ammonium transporter 3.3         | mix_LOC100248822.2.2  | VIT_08s0058g00140  | -0.58       | 0      | -1.1        | -1.46       |
| NR      | Nitrate reductase                | mix_LOC100264320      | VIT_18s0001g03910  | <b>1.21</b> | 0      | <b>2.02</b> | 0.84        |
| NIR1    | Nitrite reductase 1              | mix_contig_09056      | VIT_03s0063g00370  | <b>1.24</b> | 0      | <b>2.39</b> | <b>1.42</b> |
|         |                                  | mix_contig_10888      | VIT_03s0063g00370  | <b>1.37</b> | 0.66   | <b>2.5</b>  | <b>1.45</b> |
| GLT1    | Glutamate synthase               | mix_LOC100246868      | VIT_16s0098g00290  | 0.69        | 0.84   | <b>1.48</b> | <b>1.32</b> |
| GS2     | Glutamine synthetase             | mix_contig_00751      | VIT_05s0020g02480  | <b>1.09</b> | 0      | <b>1.83</b> | 0.93        |
|         |                                  | mix_LOC100261413.1.2  | VIT_05s0020g02480  | <b>1.05</b> | 0      | <b>1.82</b> | 0.91        |
|         |                                  | mix_LOC100261413.2.2  | VIT_05s0020g02480  | <b>1.03</b> | 0      | <b>1.96</b> | 0.92        |
| GSR     | Glutamate synthase               | mix_contig_00892      | VIT_14s0006g00350  | 0.72        | 0.63   | <b>1.2</b>  | 0.55        |
|         |                                  | mix_contig_01347      | VIT_17s0000g01910  | 0.69        | 0.58   | <b>1.06</b> | 0           |
|         |                                  | mix_contig_02263      | VIT_14s0006g00350  | 0.72        | 0.64   | <b>1.21</b> | 0.57        |
|         |                                  | mix_contig_02304      | VIT_14s0006g00350  | 0.7         | 0      | <b>1.28</b> | 0.6         |
|         |                                  | mix_contig_06858      | VIT_14s0006g00350  | 0.7         | 0.6    | <b>1.14</b> | 0           |
|         |                                  | mix_GLNA2.1.7         | VIT_14s0006g00350  | 0.84        | 0      | <b>1.4</b>  | 0           |
|         |                                  | mix_GLNA2.2.7         | VIT_14s0006g00350  | 0.69        | 0.59   | <b>1.26</b> | 0.63        |
|         |                                  | mix_GLNA2.3.7         | VIT_14s0006g00350  | 0.69        | 0.61   | <b>1.3</b>  | 0.6         |
|         |                                  | mix_GLNA2.4.7         | VIT_14s0006g00350  | 0.72        | 0.61   | <b>1.2</b>  | 0           |
|         |                                  | mix_GLNA2.5.7         | VIT_15s0024g01530  | 0.69        | 0.57   | <b>1.17</b> | 0.56        |
|         |                                  | mix_GLNA2.6.7         | VIT_14s0006g00350  | 0.78        | 0.64   | <b>1.16</b> | 0           |
|         |                                  | mix_GLNA2.7.7         | VIT_14s0006g00350  | 0.74        | 0.61   | <b>1.26</b> | 0.58        |
| LBD39   | LOB domain-containing protein 39 | mix_LOC100261250.1.3  | VIT_07s0129g00330  | 0.94        | 0.64   | <b>1.51</b> | <b>1.05</b> |
|         |                                  | mix_LOC100261250.2.3  | VIT_07s0129g00330  | 0.62        | 0      | <b>1.13</b> | 0.65        |
|         |                                  | mix_LOC100261250.3.3  | VIT_07s0129g00330  | 0.74        | 0      | <b>1.27</b> | 0.79        |
| NPF2.13 | NRT1/PTR FAMILY 2.13             | mix_LOC100250071      | VIT_01s0026g01490  | -0.58       | 0      | -1.77       | -3.03       |
| NPF3.1  | NRT1/PTR FAMILY 3.1              | mix_LOC100250961      | VIT_01s0011g03400  | 0           | 0      | -1.07       | 0           |
| NPF4.5  | NRT1/PTR FAMILY 4.5              | mix_contig_05016      | VIT_18s0001g11280  | 0           | -0.54  | 0           | -1.39       |
| NPF6.3  | NRT1/PTR FAMILY 6.3              | mix_contig_00176      | VIT_02s0154g00260  | 0.63        | 0.78   | <b>1.05</b> | <b>1.45</b> |
|         |                                  | mix_contig_09300      | VIT_02s0154g00260  | 0.84        | 0      | <b>1.41</b> | <b>1.51</b> |
| NRT2.4a | Nitrate transporter 2.4a         | mix_contig_00726      | VIT_06s0061g00320  | <b>1.29</b> | 0.97   | <b>2.23</b> | 0.95        |
|         |                                  | mix_contig_09409      | VIT_06s0061g00320  | <b>1.34</b> | 0.95   | <b>2.28</b> | 1           |
|         |                                  | mix_LOC100241340      | VIT_06s0061g00320  | <b>1.31</b> | 0.95   | <b>2.25</b> | 0.93        |
| NRT2.4b | Nitrate transporter 2.4b         | mix_LOC100263699.1.2  | VIT_08s0040g01500  | <b>1.4</b>  | 0.87   | <b>2.27</b> | 0.89        |
|         |                                  | mix_LOC100263699.2.2  | VIT_08s0040g01500  | <b>1.66</b> | 0      | <b>2.18</b> | 0           |
| NRT2.5  | Nitrate transporter 2.5          | mix_LOC100260250      | VIT_01s0127g00070  | 0.5         | -0.51  | <b>1.08</b> | -0.69       |
| NRT3.1  | Nitrate transporter 3.1          | mix_contig_00610      | VIT_17s0000g09470  | <b>1.32</b> | 0.88   | <b>1.97</b> | <b>1.02</b> |
|         |                                  | mix_LOC100258771.1.2  | VIT_17s0000g09470  | <b>1.12</b> | 0.75   | <b>1.8</b>  | 0.99        |
|         |                                  | mix_LOC100258771.2.2  | VIT_17s0000g09470  | <b>1.3</b>  | 0.96   | <b>1.95</b> | <b>1.04</b> |
|         |                                  | mix_NAR21             | VIT_17s0000g09470  | <b>1.33</b> | 0.94   | <b>1.94</b> | <b>1.03</b> |
| UPM1    | Uroporphyrin methylase 1         | mix_CICLE_v10031826mg | VIT_13s0064g01470  | <b>1.46</b> | 0.71   | <b>2.35</b> | 0.92        |
|         |                                  | mix_LOC100852901.1.4  | VIT_13s0064g01470  | <b>1.52</b> | 0.69   | <b>2.39</b> | 0.99        |
|         |                                  | mix_LOC100852901.2.4  | VIT_13s0064g01470  | <b>1.49</b> | 0      | <b>2.36</b> | 0.92        |
|         |                                  | mix_LOC100852901.3.4  | VIT_13s0064g01470  | <b>1.33</b> | 0      | <b>2.31</b> | 0.84        |
|         |                                  | mix_LOC100852901.4.4  | VIT_13s0064g01470  | <b>1.54</b> | 0      | <b>2.37</b> | 0.9         |

The gene names have been associated to each contig according to the CRIBI annotation v1. Log Fold Change (LFC) values are indicated for each contig and condition. When the differential expression between HN and LN roots at a given time post-treatment was significant [ $|LFC| > 1$  and False Discovery Rate (FDR)  $< 0.01$ ], the numbers are highlighted in grey. Bold numbers indicate when genes were found to be up-regulated in the HN root side compared with LN side. Italicized numbers indicate when genes were down-regulated.

differences. The distribution of all the functional categories within the set of DEGs at 3 hpt in each combination (Supplementary Fig. S5A, B) showed that this category was over-represented only for CS/1103P, and contained 14% of the DEGs in that combination, while it was represented by

only 2.7% of the DEGs in CS/RGM. In both combinations, most of the genes related to this category were down-regulated in HN compared with LN roots.

Taken together, these results highlighted that RGM differs from 1103P in response to a heterogeneous N supply

with a higher number of genes involved and a specific pattern of expression for genes involved in hormonal or secondary metabolism pathways.

*Genes encoding nitrate transporters and enzymes involved in N metabolism are highly regulated in CS/RGM grafted plants*

In order to understand the differences between the two rootstock genotypes in their response to changes in N availability, we focused on the expression pattern of genes involved in N nutrition (absorption, metabolism, transport, and signalling). Among the genes known to be regulated by nitrate in several species, transcripts corresponding to 18 genes were found to be significantly up- or down-regulated in response to heterogeneous nitrate supply in at least one condition (Table 1). Genes encoding nitrate assimilation-related enzymes such as nitrate and nitrite reductases (*NR* and *NIR*, respectively), glutamine synthetase (*GS2*), and uroporphyrin-III C-methylase (*UPM1*), and the nitrate transporters *NRT2.4* (*NRT2.4a* and *NRT2.4b*) and *NRT3* were significantly up-regulated in HN compared with LN roots. For each of the transcripts corresponding to these genes, the LFC value was higher in CS/RGM than in CS/1103P (Supplementary Table S4). CS/RGM was more affected by the N availability modification, as the transcripts corresponding to these 18 genes were all significantly differentially expressed only in this combination, while only seven of them exhibited an  $|LFC| > 1$  (and an  $FDR < 0.01$ ) in CS/1103P. CS/RGM-specific responsive transcripts encoded the nitrate transporter *NRT2.5* and NPF transporters such as *NPF6.3*, the cytosolic isoform of the glutamine synthetase (*GSR*), and 6-phosphogluconate dehydrogenase (*6PGDH*). Some genes were down-regulated in HN roots compared with LN roots specifically in CS/RGM (*AMT*, *NPF2.13*, *NPF3.1*, and *NPF4.5*).

The expression profiles of seven genes with contrasting patterns were verified by qPCR. *NR*, *NIR*, *NPF6.3*, *NRT2.4a*, *NRT2.4b*, *NRT3*, and *GS2* were differentially expressed in both combinations, following the same pattern of expression ratio between the HN and LN conditions (Fig. 7). The ratio of transcript abundance between HN and LN roots was 0.82- to 6.73-fold depending on the gene, and was higher in CS/RGM (average ratio=3.04) than in CS/1103P (average ratio=2.12). Pairwise Pearson's correlations between LFC values from edgeR analysis on RNA-seq data and those from qPCR data showed a strong correlation, indicating that the two methods gave very similar profiles (Fig. 7). Interestingly, the pronounced response observed for CS/RGM was found to be correlated with a higher difference of nitrate content between each side of the root system. Nitrate quantification performed on root samples showed that the nitrate content was significantly higher in HN roots than LN roots at 24 hpt in both combinations. Moreover, the ratio between each N condition was higher for CS/RGM than for CS/1103P (Fig. 8).

*Weighted gene co-expression network analysis to identify hub genes in response to N availability*

A gene co-expression network analysis was conducted using the WGCNA R package (Langfelder and Horvath, 2008). This approach was used to define clusters of highly correlated genes (modules). Including the grey module (which contained the unconnected genes), 26 modules were found and analysed for their association with each experimental trait (correlation with genotype, N condition, or time) (Fig. 9). Then, a kME value (module eigengene-based connectivity) was calculated for each transcript to every module (Supplementary Table S5). For each module eigengene, highly correlated transcripts were filtered with a correlation coefficient  $> 0.80$  and a  $P$ -value  $< 0.01$ . The first 100 transcripts were selected to perform an enrichment analysis using Mefisto; the resulting enriched categories are summarized in Supplementary Table S6. The genes corresponding to the transcripts that showed the highest correlation coefficient ( $> 0.9$ ) with the module eigengene were considered as potential hub genes.

With regard to N treatment, the modules 'greenyellow' and 'purple' showed the highest correlation value with the HN condition and the lowest  $P$ -value (Fig. 9). The module 'greenyellow' included transcripts up-regulated in the HN roots in both combinations (Fig. 10A) and functional categories were found to be linked to the N response, including nitrate metabolism- and transport-related categories, but also OPP electron transfer and tetrapyrrole synthesis. Most of the nitrate-related genes were found in this module (*6PGDH*, *GS2*, *NR*, *NIR*, and *LBD39*) and some of the corresponding transcripts showed a high connectivity with the eigengene (kME  $> 0.8$ ; Supplementary Table S5). *TGA1*, *TGA4*, and two-component response regulator *ARR9*-encoding genes were identified with a kME value  $> 0.9$  in this module.

The module 'purple' correlated positively with the HN condition and CS/RGM (Fig. 10B). The most enriched categories were linked to nitrate transport and ammonia metabolism (Supplementary Table S5). N-related transcripts such as *GLT1*, *NRT2.4a*, and *NPF6.3* were present in this module. The gene with the highest kME value encoded a BTB/POZ and TAZ domain-containing protein 1-like. Genes encoding *TGA1*, *ERF*, and *LBD38/39* transcription factors, as well as CBL-interacting protein kinases, were also found as potential hub genes in this module.

Three modules, 'lightyellow', 'pink', and 'lightgreen', were found to be associated with the LN treatment. The first two of these shared the ethylene functional category, the module 'lightyellow' contained also cell-wall-associated genes, and the module 'pink' contained some genes linked to RNA regulation. The module 'lightgreen' contained genes related to a hormone class described in the BIN code as 'abscisic acid synthesis-degradation', which corresponds to the strigolactone pathway. These genes belong to the CS/RGM cluster 6 (Fig. 6B), indicating that they showed a significant increase in transcript level in the LN roots compared with the HN roots only in this combination.

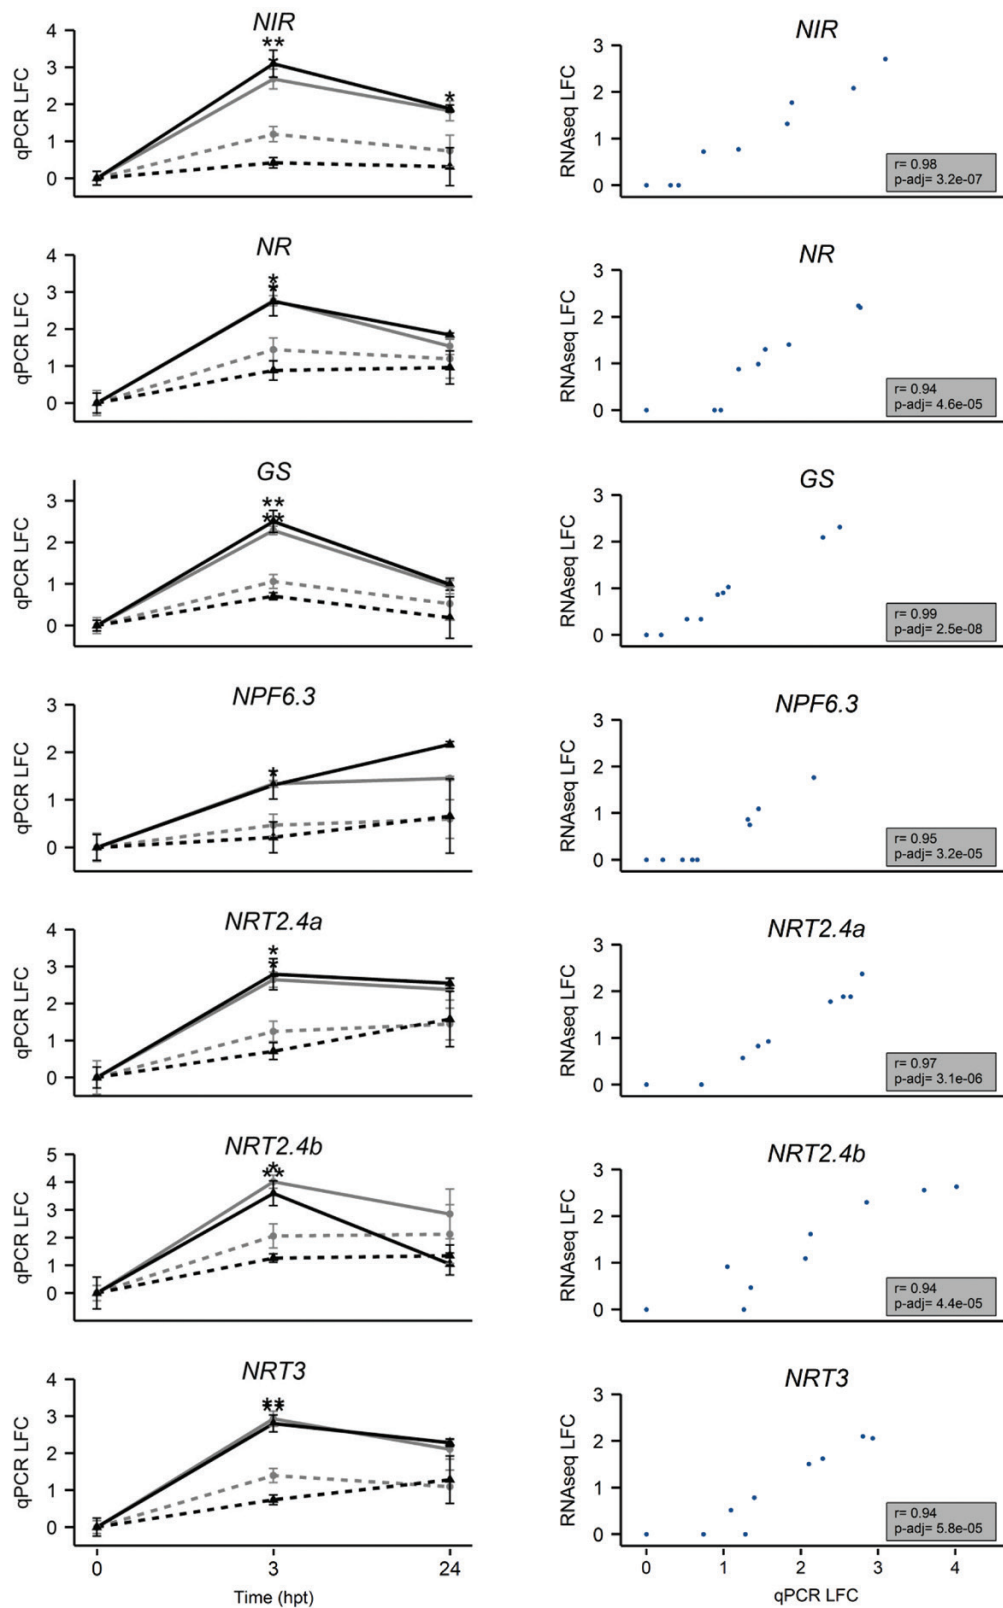

**Fig. 7.** Validation of expression profiles of N-related genes by qPCR. Left panel, LFC values of normalized gene expression quantified using qPCR. Transcript levels are normalized to the reference genes *EF1 $\gamma$*  (*VIT\_12s0035g01130*) and *GAPDH* (*VIT\_17s0000g10430*) and relative to the control condition LN at 0 hpt for each combination. CS/1103P is represented in black and CS/RGM in grey. The HN condition is indicated by solid lines and the LN condition by dashed lines. Data are presented as mean  $\pm$  SE ( $n=3$  biological replicates). Significant differences between conditions at each time point are indicated as  $*P < 0.05$  and  $**P < 0.01$  (Student's  $t$ -test). Right panel. Pearson's correlations of the LFC values obtained in qPCR (x-axis) and in RNA-seq with edgeR (y-axis) relative to the control condition LN at 0 hpt for each combination. The correlation coefficient and  $P$ -value (Bonferroni adjusted) are presented in the grey boxes. (This figure is available in colour at *JXB* online.)

Modules ‘blue’ and ‘turquoise’ were associated with RGM and 1103P, respectively. They contained genes whose expression pattern was correlated to one genotype regardless of the treatment or the time. In both of these modules, many highly connected genes were related to biotic stress. An LHY-encoding transcript was found to be positively connected to the module ‘blue’ (kME value 0.98) and negatively connected to the module ‘turquoise’.

Conversely, an *ELF4*-like gene was highly positively connected to module ‘turquoise’ and negatively to module ‘blue’. LHY and ELF4 are both required for circadian clock function in *Arabidopsis* (Kikis *et al.*, 2005). These results suggested that some genes involved in the circadian clock regulation of plant growth might be differentially regulated in the two rootstock genotypes.

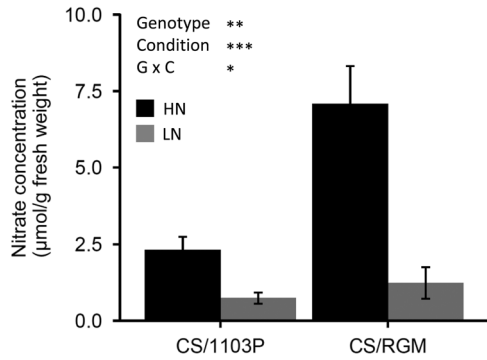

**Fig. 8.** Nitrate concentrations in root samples of CS/1103P and CS/RGM at 24 hpt. Data are presented as mean±SE (*n*=3 biological replicates). Statistical analyses of the rootstock genotype (genotype), nitrogen supply (condition), and their interaction (genotype × condition) effects were performed by analysis of variance: \**P*<0.05, \*\**P*<0.01, \*\*\**P*<0.001. Bars are shaded depending on condition, with black corresponding to HN roots and grey to LN roots.

### Discussion

To understand the molecular mechanisms involved in rootstock control of scion growth, the present study focused on two rootstock genotypes, RGM and 1103P, known to induce contrasting scion growth for the grape cultivar CS. Grafted plants were placed in a heterogeneous N availability condition by means of a split-root experiment and root transcriptomic analyses were performed. As this experimental design tended to mimic natural conditions in which N availability is fluctuating, the plants sensed both low and high N content, and gene expression was regulated in response to local and systemic signals (Li *et al.*, 2014). The transcriptomic responses were investigated at 3 hpt in order to detect the changes due to rapid regulation in response to a local change of N supply, and at 24 hpt, as the response to systemic N signalling integrating whole-plant functioning appears at later time points (Ruffel *et al.*, 2011; Li *et al.*, 2014).

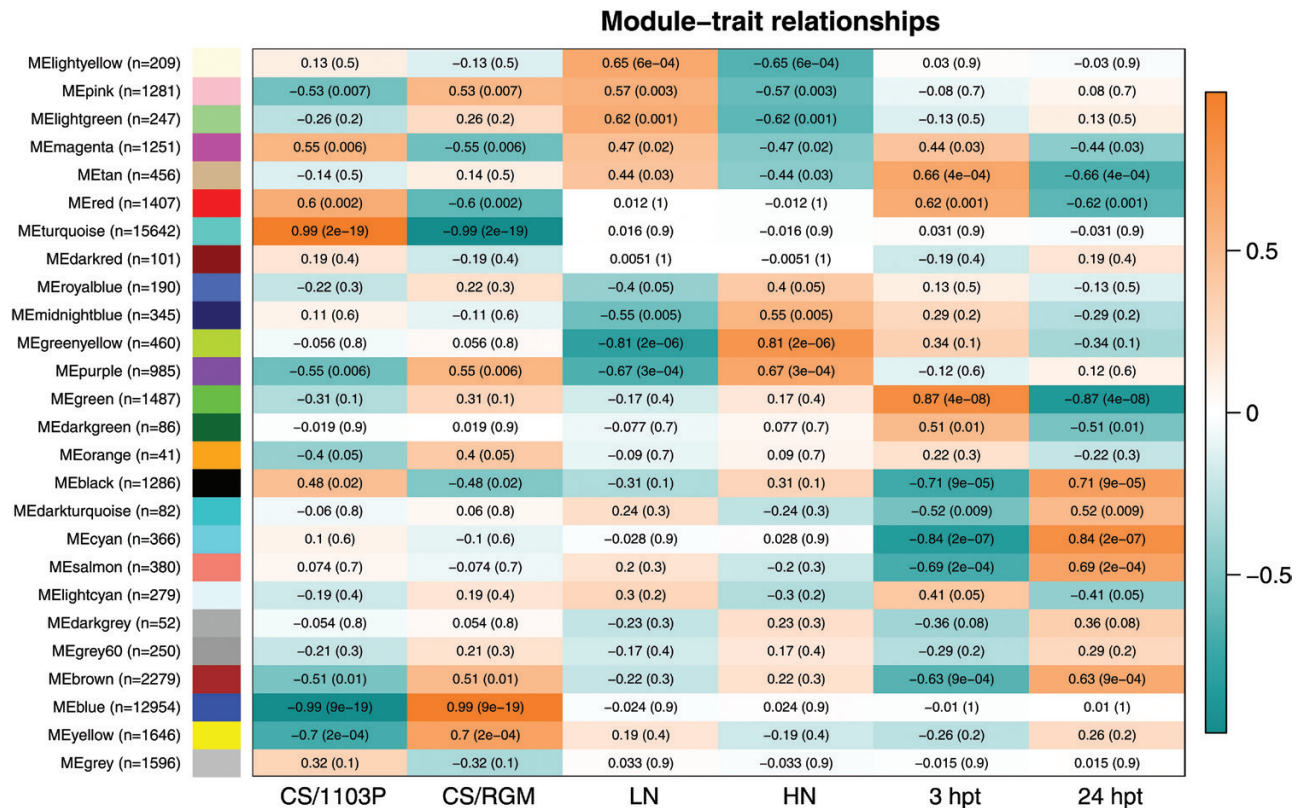

**Fig. 9.** Module-trait relationships. Experimental traits correspond to each column and their association with each module eigengene (rows) is represented by a correlation coefficient and *P*-value within parentheses. The colour of the cell indicates the correlation coefficient between the traits: orange indicates a high positive correlation and turquoise a high negative correlation. In the left panel, the number of contigs included in each module is presented in parentheses.

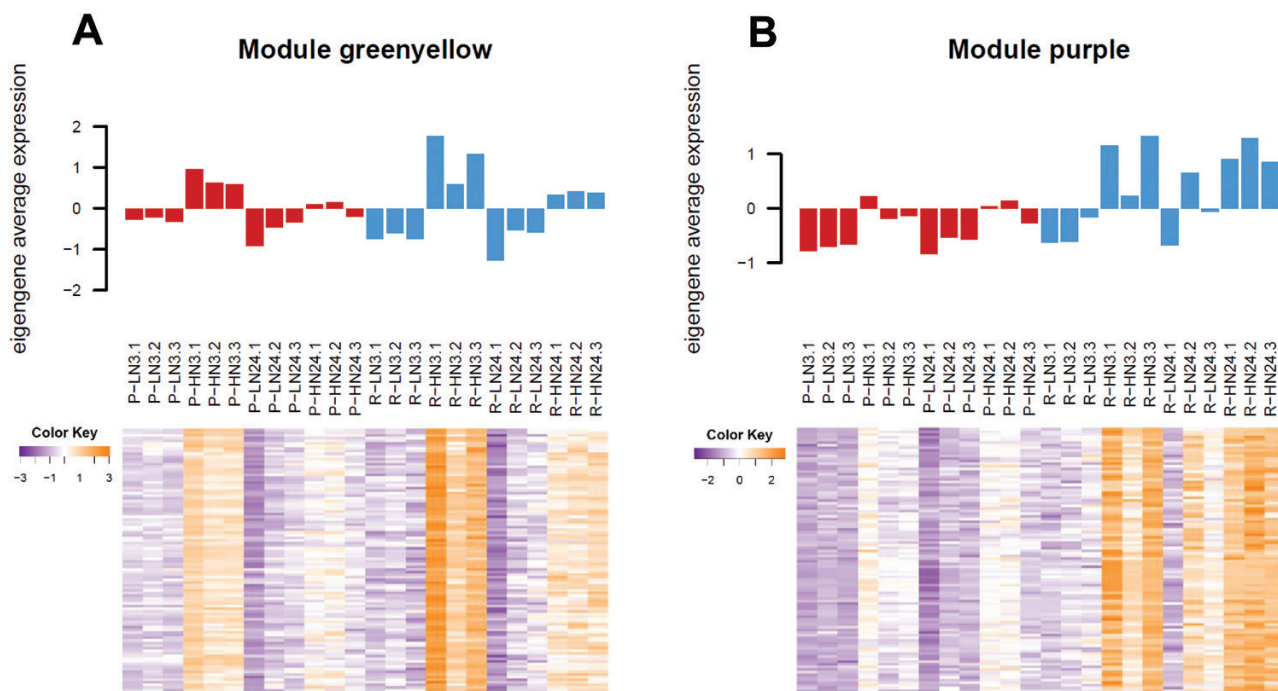

**Fig. 10.** Eigengene average expression. For the selected modules (A) ‘greenyellow’ and (B) ‘purple’, samples are represented in columns. Values used for the eigengene average expression in the barplot (upper panel) come from the top 100 associated contigs according to the module membership value (kME). These values are those presented in rows on the heatmaps (orange indicates high expression and purple low expression).

To compare the different combinations, the transcriptome was *de novo* assembled, including RNA-seq reads from both combinations. The quality of the transcriptome was validated and showed a good reliability. As expected, a majority of transcripts corresponded to the *V. vinifera* reference genome, reinforcing confidence in this *de novo* assembly approach, even if other works that also focused on grapevine, such as Corso *et al.* (2015), provided satisfying results through a guided assembly strategy.

#### *Heterogeneous nitrate supply modulates the root transcriptome in the two scion/rootstock combinations in different ways*

The differential analysis of transcript levels between HN and LN roots at 3 and 24 hpt highlighted that gene expression was more profoundly impacted by the difference in nitrate availability in CS/RGM than in CS/1103P. Nitrate measurements confirmed these results and suggested a close regulation of nitrate uptake, depending on its availability, for CS/RGM. In addition, a WGCNA analysis defined modules containing genes for which the expression profiles were associated to the different experimental traits and identified genes that could act as a hub in more than one module.

A common set of genes exhibiting the same transcriptional regulation in both genotypes, that is, up- or down-regulation in HN roots compared with LN roots, was identified. These N-responsive genes, which are involved in N uptake and assimilation (e.g. *NRT2.4a*, *NR*, and *NIR*), are specific key actors of the systemic N signalling in *A. thaliana* and *M. truncatula* (Li *et al.*, 2014).

Other known actors responded to the N availability in both genotypes and were found to be included in the ‘greenyellow’ module, which correlated positively with HN treatment. The OPP pathway represented the most significantly enriched category. In this category, the genes encoding glucose-6-phosphate dehydrogenase (G6PDH) and 6-phosphogluconate dehydrogenase (6PGDH) were previously shown to be induced by high nitrate levels (Wang *et al.*, 2003; Lejay *et al.*, 2008). The OPP electron-transfer-related genes correspond to the ferredoxin precursors essential for NIR. Furthermore, the nitrite reduction catalysed by NIR needs a siroheme as a binding site for the nitrite. UPM1 is involved in the production of siroheme (Tanaka and Tanaka, 2007) via the tetrapyrrole biosynthesis pathway, which corresponds to another category that was significantly enriched in the ‘greenyellow’ module. The genes encoding TGA1 and TGA4 were highly connected to this module eigengene, suggesting that they might be key regulators of the core N response in grapevine roots. In Arabidopsis, the TGA1/TGA4 transcription factors may function in the same nitrate-signalling pathway of NRT2.1/NRT2.2 to regulate lateral root density (Alvarez *et al.*, 2014).

Interestingly, the module ‘purple’ correlated positively with HN treatment and RGM rootstock genotype. N-related genes such as *GLT1*, *NRT2.4a*, and *NPF6.3* were also present in this module. These genes were significantly up-regulated in RGM in HN roots compared with LN roots at 3 hpt. They were also up-regulated in 1103P, although the level of transcripts (evidenced in both RNA-seq and qPCR data) and the LFC values were lower in CS/1103P than in CS/RGM. Thus, this specific RGM response could be attributed either to genes not responding or genes showing a weaker induction in 1103P.

Although *NRT2.4a* was up-regulated in HN roots in both 1103P and RGM, it was found in this RGM-associated module. In grapevine, among the four genes belonging to the *NRT2* family, two encode proteins showing a high similarity to the Arabidopsis AtNRT2.4/AtNRT2.2/AtNRT2.1 protein clade. These nitrate transporters function as two-component high-affinity nitrate influx transporters in Arabidopsis, and form a tetrameric protein complex with AtNAR2.1 (also named AtNRT3.1 or WR3) (Kotur *et al.*, 2012). The corresponding grapevine genes have been named *NRT2.4a* and *NRT2.4b*, and their expression has been previously shown to be affected by nitrate supply (Pii *et al.*, 2014; Tomasi *et al.*, 2015). Interestingly, *NRT2.4a* responded differently depending on the root system side and exhibited the same expression profile as *NRT3.1*. In Arabidopsis, *NRT2.1* is subject to both local and systemic regulation and has been shown to regulate lateral root development (Little *et al.*, 2005; Remans *et al.*, 2006), while *AtNRT2.4* is induced by nitrate starvation and is involved in the uptake of nitrate in low N conditions (Okamoto *et al.*, 2003; Kiba *et al.*, 2012). Our results suggest that grapevine *NRT2.4a* may be an orthologue of *AtNRT2.1* and may play an important role in the response to heterogeneous nitrate availability.

The top hub gene of the module ‘purple’ encodes a BTB/POZ and TAZ domain-containing protein 1-like. Using a systems biology approach, Araus *et al.* (2016) recently identified *BT2*, a BTB/POZ and TAZ domain protein-encoding gene, as the most central and connected gene in an Arabidopsis N use efficiency (NUE) network. They suggested that *BT* gene family members act as negative regulators of nitrate uptake and NUE in plants. In our study, this gene appeared as a hub gene in a module correlated with the rootstock genotype that confers the lower scion growth (i.e. RGM). The present results cannot demonstrate a role for *BT* genes in grapevine in response to N availability; however, these genes are interesting candidates for future research on NUE control by the rootstock.

The transcription factor gene *TCP20* plays a key role in the systemic signalling pathway that directs root foraging in heterogeneous N availability (Guan *et al.*, 2014). Interestingly, a gene encoding a homologue of *AtTCP20* was identified in the module ‘blue’. This module was uncorrelated to nitrate treatment, which is consistent with the fact that in Arabidopsis this gene is not nitrate inducible (Wang *et al.*, 2003; Wang *et al.*, 2004). However, the module ‘blue’ was strictly positively correlated with RGM, suggesting that this transcription factor represents an important actor for further characterization of the influence of rootstock genotype on systemic signalling in response to N availability.

#### *Transcriptional regulation of the ethylene and strigolactone pathway genes is rootstock dependent*

Genes belonging to the ethylene-related functional category were significantly over-represented in the DEGs between LN and HN roots in both genotypes, but with a time-dependent expression pattern. Most of these genes encode members of the *apetala2*/ethylene response factor (AP2/ERF-TF) super

family. A recent study showed that the expression of these genes was regulated by N availability (Zhao *et al.*, 2015). The interaction between ethylene and N affects several physiological processes, including root architecture (Khan *et al.*, 2015). In addition, in Arabidopsis, ethylene regulates some nitrate transporters, such as NPF6.3 and NRT2.1 (Tian *et al.*, 2009). The WGCNA approach confirmed that *ERF* genes were found in modules associated with the LN treatment. Interestingly, this approach also highlighted several genes putatively involved in strigolactone biosynthesis in a module that was positively associated with LN treatment. These genes were significantly up-regulated in LN roots compared with HN roots only in CS/RGM. Strigolactones belong to a recently identified group of plant hormones known to regulate plant development and architecture in response to the environment, particularly phosphorus and N availability (Xie *et al.*, 2010; Waldie *et al.*, 2014; Lopez-Obando *et al.*, 2015; Pandey *et al.*, 2016). Interestingly, their expression was modulated in the rootstock that is known to confer the lower scion vigour (RGM), particularly when plants are facing limiting N availability (Lecourt *et al.*, 2015). These results highlighted a contrasting N response between the rootstocks, implying different regulation between hormonal pathways and N content.

#### *Various circadian-clock-related genes are highly connected to modules associated with each rootstock genotype*

The circadian clock regulates many aspects of plant biology, including primary metabolism, hormone signalling, responses to biotic and abiotic stresses, and plant development. The mechanisms of the plant circadian clock involve multiple interlocking transcriptional feedback loops (Greenham and McClung, 2015). *CCA1* and *LHY* encode MYB transcription factors, which are components of a negative feedback loop at the centre of the Arabidopsis circadian clock. *CCA1*/*LHY* may be involved in a morning loop, and *ELF3* and *ELF4* are members of an evening loop (McClung, 2014). It has been suggested that in roots the circadian clock orchestrates diurnal carbon allocation and growth (Yazdanbakhsh *et al.*, 2011). Here, we showed that some components of the circadian transcriptional feedback loops followed different expression patterns in the roots of the two rootstocks, and that two of these genes (*ELF4* and *LHY*) may be hub genes conversely connected to modules associated with each genotype. This result suggests that circadian-clock-related genes, and thus control of metabolism and development, are differentially regulated in the two genotypes.

## Conclusion

This comparative global transcriptomic analysis in roots of grafted grapevines showed that the two studied rootstocks responded differently to heterogeneous N availability. These results highlighted that, in addition to a core N response common to both genotypes, the transcriptomic response was, unexpectedly, enhanced in the rootstock conferring the lower scion vigour (RGM). The difference between the

two genotypes was even more pronounced at 24 hpt and involved genes related to hormonal pathways such as the ethylene and strigolactone pathways. These results suggest the involvement of N nutrition in the control of grafted scion vigour, since two rootstocks differing in this developmental trait presented a genotype-specific transcriptomic signature. They also showed a difference in the timeframe at which a systemic response occurred in response to N heterogeneity; this difference may originate from the integration of different metabolic signals from the whole plant. In addition to the differential gene expression analysis, a WGCNA analysis provided insights into the gene networks and the hub genes connected to genotype-specific modules. These hub genes are interesting candidates for further investigations of the control of scion vigour by the rootstock and of the control of NUE in grapevine.

## Supplementary data

Supplementary data are available at *JXB* online.

Fig. S1. Length distribution of *de novo* assembled contigs.

Fig. S2. Top-hit species distribution of the merged final transcriptome.

Fig. S3. Multidimensional scaling plot of count data from the different RNA-seq samples

Fig. S4. The few DEGs responding to N availability in CS/1103P involve mainly N-related genes.

Fig. S5. Functional categories distribution within DEGs.

Table S1. Read number before (raw) and after trimming (cleaned).

Table S2. Summary table of the *de novo* assemblies.

Table S3. List of the primers used for qPCR experiments.

Table S4. Pairwise comparisons resulting from differential expression analysis performed using edgeR.

Table S5. Gene module membership.

Table S6. BIN code enrichment for each WGCNA module.

## Acknowledgements

We thank the staff of the laboratory for their technical assistance. This work was supported by grants from the Conseil Interprofessionnel du Vin de Bordeaux (CIVB) (contract no. 28325) and FranceAgriMer, the ECOS Sud program (contract no. C11B01), and the French Ministry of Research and Higher Education.

## References

**Albacete A, Martínez-Andújar C, Martínez-Pérez A, Thompson AJ, Dodd IC, Pérez-Alfocea F.** 2015. Unravelling rootstock×scion interactions to improve food security. *Journal of Experimental Botany* **66**, 2211–2226.

**Alvarez JM, Riveras E, Vidal EA, et al.** 2014. Systems approach identifies TGA1 and TGA4 transcription factors as important regulatory components of the nitrate response of *Arabidopsis thaliana* roots. *The Plant Journal* **80**, 1–13.

**Alvarez JM, Vidal EA, Gutiérrez RA.** 2012. Integration of local and systemic signaling pathways for plant N responses. *Current Opinion in Plant Biology* **15**, 185–191.

**Araus V, Vidal EA, Puelma T, Alamos S, Mieulet D, Guiderdoni E, Gutiérrez RA.** 2016. Members of BTB gene family of scaffold proteins

suppress nitrate uptake and nitrogen use efficiency. *Plant Physiology* **171**, 1523–1532.

**Bouguyon E, Gojon A, Nacry P.** 2012. Nitrate sensing and signaling in plants. *Seminars in Cell & Developmental Biology* **23**, 648–654.

**Cabau C, Escudé F, Djari A, Guiguen Y, Bobe J, Klopp C.** 2017. Compacting and correcting Trinity and Oases RNA-Seq *de novo* assemblies. *PeerJ* **5**, e2988.

**Canales J, Moyano TC, Villarreal E, Gutiérrez RA.** 2014. Systems analysis of transcriptome data provides new hypotheses about *Arabidopsis* root response to nitrate treatments. *Frontiers in Plant Science* **5**, 22.

**Cataldo DA, Haroon M, Schrader LE, Youngs VL.** 1975. Rapid colorimetric determination of nitrate in plant tissue by nitration of salicylic acid. *Communications in Soil Science and Plant Analysis* **6**, 71–80.

**Cookson SJ, Clemente Moreno MJ, Hevin C, Nyamba Mendome LZ, Delrot S, Trossat-Magnin C, Ollat N.** 2013. Graft union formation in grapevine induces transcriptional changes related to cell wall modification, wounding, hormone signalling, and secondary metabolism. *Journal of Experimental Botany* **64**, 2997–3008.

**Cookson SJ, Hevin C, Donnart M, Ollat N.** 2012. Grapevine rootstock effects on scion biomass are not associated with large modifications of primary shoot growth under nonlimiting conditions in the first year of growth. *Functional Plant Biology* **39**, 650–660.

**Cookson SJ, Ollat N.** 2013. Grafting with rootstocks induces extensive transcriptional re-programming in the shoot apical meristem of grapevine. *BMC Plant Biology* **13**, 147.

**Corso M, Vannozzi A, Maza E, et al.** 2015. Comprehensive transcript profiling of two grapevine rootstock genotypes contrasting in drought susceptibility links the phenylpropanoid pathway to enhanced tolerance. *Journal of Experimental Botany* **66**, 5739–5752.

**Crawford NM, Glass ADM.** 1998. Molecular and physiological aspects of nitrate uptake in plants. *Trends in Plant Science* **3**, 389–395.

**Csikasz-Krizsics A, Diófasi L.** 2008. Effects of rootstock×scion combinations on macroelements availability of the vines. *Central European Agriculture* **9**, 495–504.

**Dalbo AM, Schuck E, Basso C.** 2011. Influence of rootstock on nutrient content in grape petioles. *Revista Brasileira de Fruticultura* **33**, 941–947.

**Gan Y, Bernreiter A, Filleul S, Abram B, Forde BG.** 2012. Overexpressing the ANR1 MADS-box gene in transgenic plants provides new insights into its role in the nitrate regulation of root development. *Plant & Cell Physiology* **53**, 1003–1016.

**Gojon A, Krouk G, Perrine-Walker F, Laugier E.** 2011. Nitrate transceptor(s) in plants. *Journal of Experimental Botany* **62**, 2299–2308.

**Goldschmidt EE.** 2014. Plant grafting: new mechanisms, evolutionary implications. *Frontiers in Plant Science* **5**, 1–9.

**Grabherr MG, Haas BJ, Yassour M, et al.** 2011. Full-length transcriptome assembly from RNA-Seq data without a reference genome. *Nature Biotechnology* **29**, 644–652.

**Greenham K, McClung CR.** 2015. Integrating circadian dynamics with physiological processes in plants. *Nature Reviews. Genetics* **16**, 598–610.

**Guan P, Wang R, Nacry P, Breton G, Kay SA, Prunedo-Paz JL, Davani A, Crawford NM.** 2014. Nitrate foraging by *Arabidopsis* roots is mediated by the transcription factor TCP20 through the systemic signaling pathway. *Proceedings of the National Academy of Sciences of the United States of America* **111**, 15267–15272.

**Jaillon O, Aury JM, Noel B, et al.** 2007. The grapevine genome sequence suggests ancestral hexaploidization in major angiosperm phyla. *Nature* **449**, 463–467.

**Kent WJ.** 2002. BLAT: The Blast-Like Alignment Tool. *Genome Research* **12**, 47–56.

**Khan MI, Trivellini A, Fatma M, Masood A, Francini A, Iqbal N, Ferrante A, Khan NA.** 2015. Role of ethylene in responses of plants to nitrogen availability. *Frontiers in Plant Science* **6**, 927.

**Kiba T, Feria-Bourrellier AB, Lafouge F, et al.** 2012. The *Arabidopsis* nitrate transporter NRT2.4 plays a double role in roots and shoots of nitrogen-starved plants. *The Plant Cell* **24**, 245–258.

- Kiba T, Kudo T, Kojima M, Sakakibara H.** 2011. Hormonal control of nitrogen acquisition: roles of auxin, abscisic acid, and cytokinin. *Journal of Experimental Botany* **62**, 1399–1409.
- Kikis EA, Khanna R, Quail PH.** 2005. ELF4 is a phytochrome-regulated component of a negative-feedback loop involving the central oscillator components CCA1 and LHY. *The Plant Journal* **44**, 300–313.
- Kotir Z, Mackenzie N, Ramesh S, Tyerman SD, Kaiser BN, Glass AD.** 2012. Nitrate transport capacity of the *Arabidopsis thaliana* NRT2 family members and their interactions with AtNAR2.1. *New Phytologist* **194**, 724–731.
- Krapp A.** 2015. Plant nitrogen assimilation and its regulation: a complex puzzle with missing pieces. *Current Opinion in Plant Biology* **25**, 115–122.
- Krapp A, David LC, Chardin C, et al.** 2014. Nitrate transport and signalling in *Arabidopsis*. *Journal of Experimental Botany* **65**, 789–798.
- Krouk G.** 2016. Hormones and nitrate: a two-way connection. *Plant Molecular Biology* **91**, 599–606.
- Langfelder P, Horvath S.** 2008. WGCNA: an R package for weighted correlation network analysis. *BMC Bioinformatics* **9**, 559.
- Lecourt J, Lauvergeat V, Ollat N, Vivin P, Cookson SJ.** 2015. Shoot and root ionome responses to nitrate supply in grafted grapevines are rootstock genotype dependent. *Australian Journal of Grape and Wine Research* **21**, 311–318.
- Lejay L, Wirth J, Pervent M, Cross JM, Tillard P, Gojon A.** 2008. Oxidative pentose phosphate pathway-dependent sugar sensing as a mechanism for regulation of root ion transporters by photosynthesis. *Plant Physiology* **146**, 2036–2053.
- Léran S, Edel KH, Pervent M, et al.** 2015. Nitrate sensing and uptake in *Arabidopsis* are enhanced by ABI2, a phosphatase inactivated by the stress hormone abscisic acid. *Science Signaling* **8**, ra43.
- Li H, Durbin R.** 2009. Fast and accurate short read alignment with Burrows-Wheeler transform. *Bioinformatics* **25**, 1754–1760.
- Li H, Handsaker B, Wysoker A, Fennell T, Ruan J, Homer N, Marth G, Abecasis G, Durbin R, 1000 Genome Project Data Processing Subgroup.** 2009. The sequence Alignment/Map format and SAMtools. *Bioinformatics* **25**, 2078–2079.
- Li Y, Krouk G, Coruzzi GM, Ruffel S.** 2014. Finding a nitrogen niche: a systems integration of local and systemic nitrogen signalling in plants. *Journal of Experimental Botany* **65**, 5601–5610.
- Little DY, Rao H, Oliva S, Daniel-Vedele F, Krapp A, Malamy JE.** 2005. The putative high-affinity nitrate transporter NRT2.1 represses lateral root initiation in response to nutritional cues. *Proceedings of the National Academy of Sciences of the United States of America* **102**, 13693–13698.
- Livak KJ, Schmittgen TD.** 2001. Analysis of relative gene expression data using real-time quantitative PCR and the  $2^{-\Delta\Delta CT}$  method. *Methods* **25**, 402–408.
- Lohse M, Nagel A, Herter T, et al.** 2014. Mercator: a fast and simple web server for genome scale functional annotation of plant sequence data. *Plant, Cell & Environment* **37**, 1250–1258.
- Lopez-Obando M, Ligerot Y, Bonhomme S, Boyer FD, Rameau C.** 2015. Strigolactone biosynthesis and signaling in plant development. *Development* **142**, 3615–3619.
- Love MI, Huber W, Anders S.** 2014. Moderated estimation of fold change and dispersion for RNA-seq data with DESeq2. *Genome Biology* **15**, 1–21.
- Mariette J, Noirot C, Nabihoudine I, Bardou P, Hoede C, Djari A, Cabau C, Klopp C.** 2014. RNAbrowse: RNA-Seq de novo assembly results browser. *PLoS ONE* **9**, e96821.
- McClung CR.** 2014. Wheels within wheels: new transcriptional feedback loops in the *Arabidopsis* circadian clock. *F1000Prime Reports* **6**, 2.
- Medici A, Krouk G.** 2014. The primary nitrate response: a multifaceted signalling pathway. *Journal of Experimental Botany* **65**, 5567–5576.
- Mounier E, Pervent M, Ljung K, Gojon A, Nacry P.** 2014. Auxin-mediated nitrate signalling by NRT1.1 participates in the adaptive response of *Arabidopsis* root architecture to the spatial heterogeneity of nitrate availability. *Plant, Cell & Environment* **37**, 162–174.
- Nacry P, Bouguyon E, Gojon A.** 2013. Nitrogen acquisition by roots: physiological and developmental mechanisms ensuring plant adaptation to a fluctuating resource. *Plant and Soil* **370**, 1–29.
- Nikolaou N, Koukourikou MA, Karagiannidis N.** 2000. Effects of various rootstocks on xylem exudates cytokinin content, nutrient uptake and growth patterns of grapevine *Vitis vinifera* L. cv. Thompson seedless. *Agronomie* **20**, 363–373.
- O'Brien JA, Vega A, Bouguyon E, Krouk G, Gojon A, Coruzzi G, Gutiérrez RA.** 2016. Nitrate transport, sensing, and responses in plants. *Molecular Plant* **9**, 837–856.
- Ohkubo Y, Tanaka M, Tabata R, Ogawa-Ohnishi M, Matsubayashi Y.** 2017. Shoot-to-root mobile polypeptides involved in systemic regulation of nitrogen acquisition. *Nature Plants* **3**, 17029.
- Okamoto M, Vidmar JJ, Glass AD.** 2003. Regulation of NRT1 and NRT2 gene families of *Arabidopsis thaliana*: responses to nitrate provision. *Plant & Cell Physiology* **44**, 304–317.
- Ollat N, Peccoux A, Papura D, et al.** 2016. Rootstocks as a component of adaptation to environment. In: Geros H, Chaves MM, Gil HM, Delrot S, eds. *Grapevine in a changing environment: a molecular and ecophysiological perspective*, Vol. 1. Chichester: Wiley-Blackwell, 68–108.
- Pandey A, Sharma M, Pandey GK.** 2016. Emerging roles of strigolactones in plant responses to stress and development. *Frontiers in Plant Science* **7**, 434.
- Parra G, Bradnam K, Ning Z, Keane T, Korf I.** 2009. Assessing the gene space in draft genomes. *Nucleic Acids Research* **37**, 289–297.
- Pii Y, Alessandrini M, Guardini K, Zamboni A, Varanini Z.** 2014. Induction of high-affinity NO<sub>3</sub><sup>-</sup> uptake in grapevine roots is an active process correlated to the expression of specific members of the NRT2 and plasma membrane H<sup>+</sup>-ATPase gene families. *Functional Plant Biology* **41**, 353–365.
- Remans T, Nacry P, Pervent M, Girin T, Tillard P, Lepetit M, Gojon A.** 2006. A central role for the nitrate transporter NRT2.1 in the integrated morphological and physiological responses of the root system to nitrogen limitation in *Arabidopsis*. *Plant Physiology* **140**, 909–921.
- Robinson MD, McCarthy DJ, Smyth GK.** 2010. edgeR: a Bioconductor package for differential expression analysis of digital gene expression data. *Bioinformatics* **26**, 139–140.
- Ruffel S, Krouk G, Ristova D, Shasha D, Birnbaum KD, Coruzzi GM.** 2011. Nitrogen economics of root foraging: transitive closure of the nitrate-cytokinin relay and distinct systemic signaling for N supply vs. demand. *Proceedings of the National Academy of Sciences of the United States of America* **108**, 18524–18529.
- Schulz MH, Zerbino DR, Vingron M, Birney E.** 2012. Oases: robust de novo RNA-seq assembly across the dynamic range of expression levels. *Bioinformatics* **28**, 1086–1092.
- Tabata R, Sumida K, Yoshii T, Ohyama K, Shinohara H, Matsubayashi Y.** 2014. Perception of root-derived peptides by shoot LRR-RLKs mediates systemic N-demand signaling. *Science* **346**, 343–346.
- Tanaka R, Tanaka A.** 2007. Tetrapyrrole biosynthesis in higher plants. *Annual Review of Plant Biology* **58**, 321–346.
- Tandonnet JP, Cookson SJ, Vivin P, Ollat N.** 2010. Scion genotype controls biomass allocation and root development in grafted grapevine. *Australian Journal of Grape and Wine Research* **16**, 290–300.
- Tian QY, Sun P, Zhang WH.** 2009. Ethylene is involved in nitrate-dependent root growth and branching in *Arabidopsis thaliana*. *New Phytologist* **184**, 918–931.
- Tomasi N, Monte R, Varanini Z, Cesco S, Pinton R.** 2015. Induction of nitrate uptake in Sauvignon Blanc and Chardonnay grapevines depends on the scion and is affected by the rootstock. *Australian Journal of Grape and Wine Research* **21**, 331–338.
- Vidal EA, Moyano TC, Krouk G, Katari MS, Tanurdzic M, McCombie WR, Coruzzi GM, Gutiérrez RA.** 2013a. Integrated RNA-seq and sRNA-seq analysis identifies novel nitrate-responsive genes in *Arabidopsis thaliana* roots. *BMC Genomics* **14**, 701.
- Vidal EA, Moyano TC, Riveras E, Contreras-López O, Gutiérrez OA.** 2013b. Systems approaches map regulatory networks downstream of the auxin receptor AFB3 in the nitrate response of *Arabidopsis thaliana* roots. *Proceedings of the National Academy of Sciences of the United States of America* **110**, 12840–12845.
- Vidal EA, Álvarez JM, Moyano TC, Gutiérrez RA.** 2015. Transcriptional networks in the nitrate response of *Arabidopsis thaliana*. *Current Opinion in Plant Biology* **27**, 125–132.



- Waldie T, McCulloch H, Leyser O.** 2014. Strigolactones and the control of plant development: lessons from shoot branching. *The Plant Journal* **79**, 607–622.
- Wang R, Okamoto M, Xing X, Crawford NM.** 2003. Microarray analysis of the nitrate response in *Arabidopsis* roots and shoots reveals over 1000 rapidly responding genes and new linkages to glucose, trehalose-6-phosphate, iron, and sulfate metabolism. *Plant Physiology* **132**, 556–567.
- Wang R, Tischner R, Gutiérrez RA, Hoffman M, Xing X, Chen M, Coruzzi G, Crawford NM.** 2004. Genomic analysis of the nitrate response using a nitrate reductase-null mutant of *Arabidopsis*. *Plant Physiology* **136**, 2512–2522.
- Warschafsky EJ, Klein LL, Frank MH, Chitwood DH, Londo JP, von Wettberg EJ, Miller AJ.** 2016. Rootstocks: diversity, domestication, and impacts on shoot phenotypes. *Trends in Plant Science* **21**, 418–437.
- Xie X, Yoneyama K, Yoneyama K.** 2010. The strigolactone story. *Annual Review of Phytopathology* **48**, 93–117.
- Xu N, Wang R, Zhao L, et al.** 2016. The *Arabidopsis* NRG2 protein mediates nitrate signaling and interacts with and regulates key nitrate regulators. *The Plant Cell* **28**, 485–504.
- Yang Y, Mao L, Jittayasothorn Y, Kang Y, Jiao C, Fei Z, Zhong GY.** 2015. Messenger RNA exchange between scions and rootstocks in grafted grapevines. *BMC Plant Biology* **15**, 251.
- Yazdanbakhsh N, Sulpice R, Graf A, Stitt M, Fisahn J.** 2011. Circadian control of root elongation and C partitioning in *Arabidopsis thaliana*. *Plant, Cell & Environment* **34**, 877–894.
- Zerihun A, Treeby MT.** 2002. Biomass distribution and nitrate assimilation in response to N supply for *Vitis vinifera* L. cv. Cabernet Sauvignon on five *Vitis* rootstock genotypes. *Australian Journal of Grape and Wine Research* **8**, 157–162.
- Zhang L, Marguerit E, Rossdeutsch L, Ollat N, Gambetta GA.** 2016. The influence of grapevine rootstocks on scion growth and drought resistance. *Theoretical and Experimental Plant Physiology* **28**, 143–157.
- Zhao W, Yang X, Yu H, Jiang W, Sun N, Liu X, Liu X, Zhang X, Wang Y, Gu X.** 2015. RNA-Seq-based transcriptome profiling of early nitrogen deficiency response in cucumber seedlings provides new insight into the putative nitrogen regulatory network. *Plant & Cell Physiology* **56**, 455–467.
